# Supplementary material for: How different are marine microbial natural products compared to their terrestrial counterparts?
Source: Royal Society of Chemistry journal article supplement (doi:10.1039/d1np00051a), 2021-10-16

## Electronic Supplementary Information (ESI)

# How different are marine microbial natural products compared to their terrestrial counterparts?

Tanja M. Voser<sup>ab</sup>, Max D. Campbell<sup>ac</sup> and Anthony R. Carroll<sup>\*ab</sup>

<sup>a</sup>School of Environment and Science, Griffith University, Gold Coast, Australia.

<sup>b</sup>Griffith Institute for Drug Discovery, Griffith University, Brisbane, Australia.

<sup>c</sup>Australian Rivers Institute - Coasts and Estuaries, Griffith University, Nathan, Australia.

---

|                                                                                            |    |
|--------------------------------------------------------------------------------------------|----|
| <b>Comparison Between the Three Different Types of Analysis</b> .....                      | 1  |
| Overlap Between Marine and Terrestrial Microbial NPs .....                                 | 1  |
| Overlap between the Three Different Groups (Clusters) .....                                | 2  |
| <b>Cluster Analysis on Extended Fingerprint (5000 Clusters)</b> .....                      | 3  |
| Overlap Between Marine and Terrestrial Microbial NPs .....                                 | 3  |
| Marine Microbial Natural Products and their overlap with Terrestrial Microbial NPs .....   | 4  |
| Overlap between the Three Different Groups (Clusters) .....                                | 5  |
| Overlap between the Three Different Groups (Compounds).....                                | 6  |
| Overlap between the Three Different Groups (Compounds & Accounting for Halogenation) ..... | 7  |
| Overlap of NPs from Marine Macro-organisms .....                                           | 8  |
| Overlap of NPs from Marine Macro-organisms (Accounting for Halogenation) .....             | 9  |
| Overlap of the Marine Microbial NPs .....                                                  | 10 |
| Closer Look at the Different Overlaps in each Phyla and Genera .....                       | 11 |
| Top Producers of Marine Only Compounds .....                                               | 16 |
| World Maps .....                                                                           | 17 |
| <b>Cluster Analysis on PubChem Fingerprint (5000 Clusters)</b> .....                       | 21 |
| Overlap Between Marine and Terrestrial Microbial NPs .....                                 | 21 |
| Marine Microbial Natural Products and their overlap with Terrestrial Microbial NPs .....   | 22 |
| Overlap between the Three Different Groups (Clusters) .....                                | 23 |
| Overlap between the Three Different Groups (Compounds).....                                | 24 |
| <b>Murcko Scaffold Analysis (9195 Scaffolds)</b> .....                                     | 25 |
| Overlap Between Marine and Terrestrial Microbial NPs .....                                 | 25 |
| Marine Microbial NPs and their overlap with Terrestrial Microbial NPs .....                | 26 |
| Overlap between the Three Different Groups (Scaffolds) .....                               | 27 |
| Overlap between the Three Different Groups (Compounds).....                                | 28 |
| Overlap of the Marine Microbial NPs .....                                                  | 29 |
| Closer Look at the Different Overlaps in each Phyla and Genera .....                       | 30 |
| Top Producers of Marine Only Compounds .....                                               | 35 |
| Similarity Analysis of the Scaffolds.....                                                  | 36 |
| World Map.....                                                                             | 37 |
| <b>Chemical Structures mentioned in the Highlight</b> .....                                | 38 |

## Comparison Between the Three Different Types of Analysis

Overlap Between Marine and Terrestrial Microbial NPs

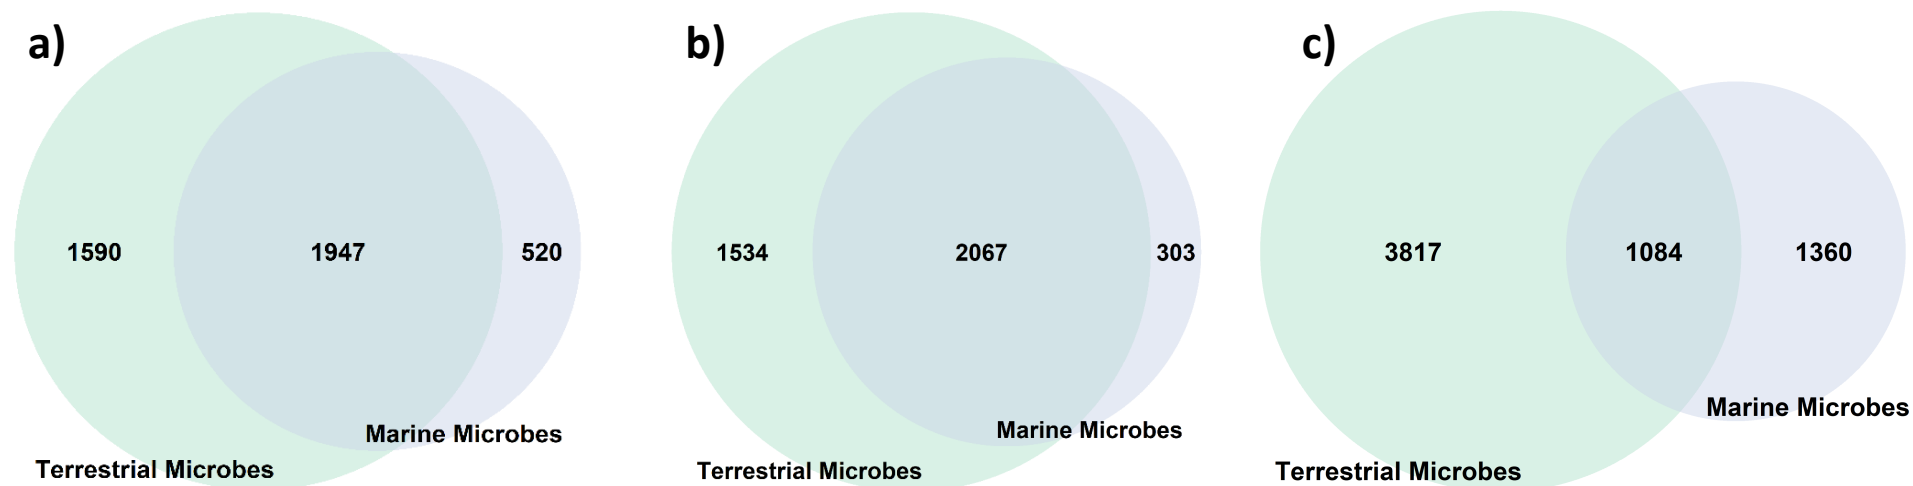

**Fig. S1** a) Overlap between marine (blue) and terrestrial (green) microbial molecular clusters. The three different graphs represent the different analysis performed. a) shows the results from the extended fingerprint cluster analysis (which resulted in a total of 5000 clusters), b) shows the results of the fingerprint cluster analysis using the PubChem fingerprint (with the total of 5000 clusters) and c) shows the results of the scaffold analysis, where the NPs were divided into 9,195 scaffolds.

## Overlap between the Three Different Groups (Clusters)

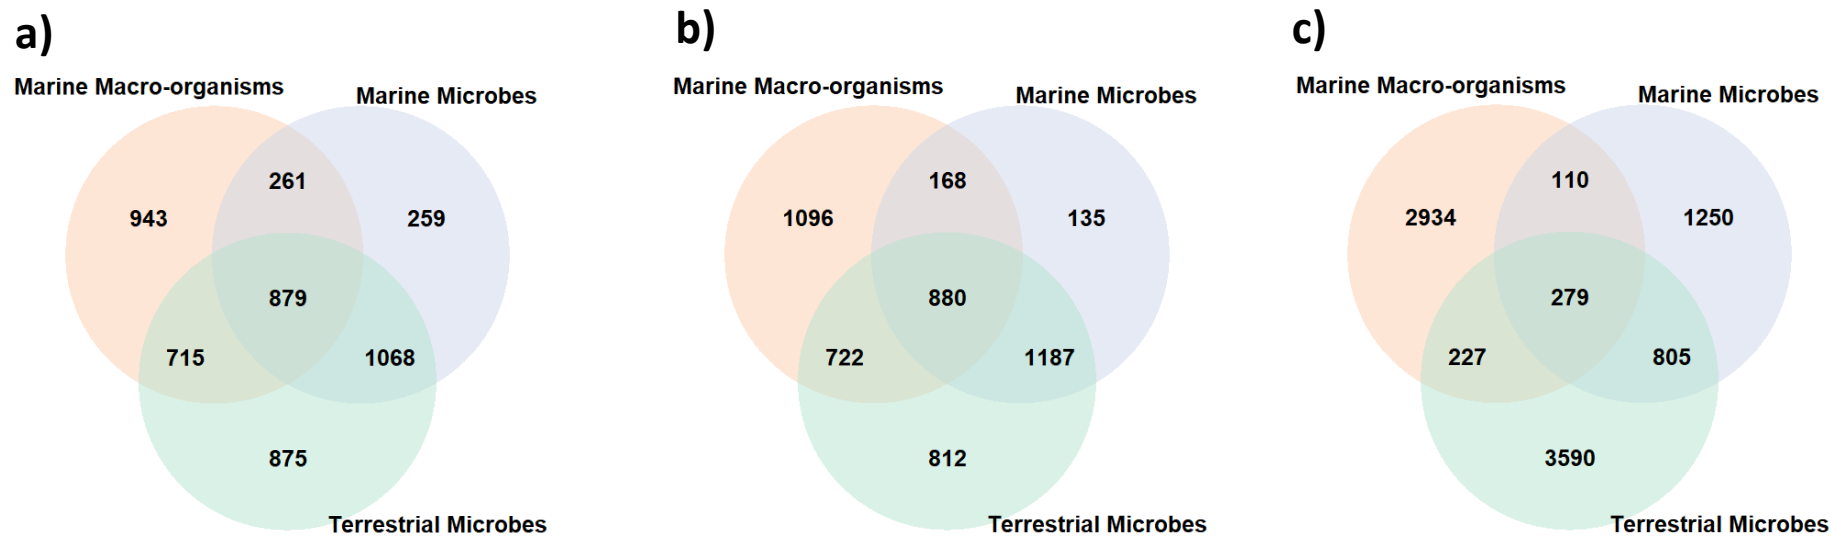

**Fig. S2** a) Nesting of NPs from marine macro-organisms (orange), marine microorganisms (blue) and terrestrial microorganisms (green). Total number of clusters in each section is given in black. The three different graphs represent the different analysis performed. a) shows the results from the extended fingerprint cluster analysis (resulting in a total of 5000 clusters), b) shows the results of the fingerprint cluster analysis using the PubChem fingerprint (with the total of 5000 clusters) and c) shows the results of the scaffold analysis, where the NPs were divided into 9,195 scaffolds.

## Cluster Analysis on Extended Fingerprint (5000 Clusters)

Overlap Between Marine and Terrestrial Microbial NPs

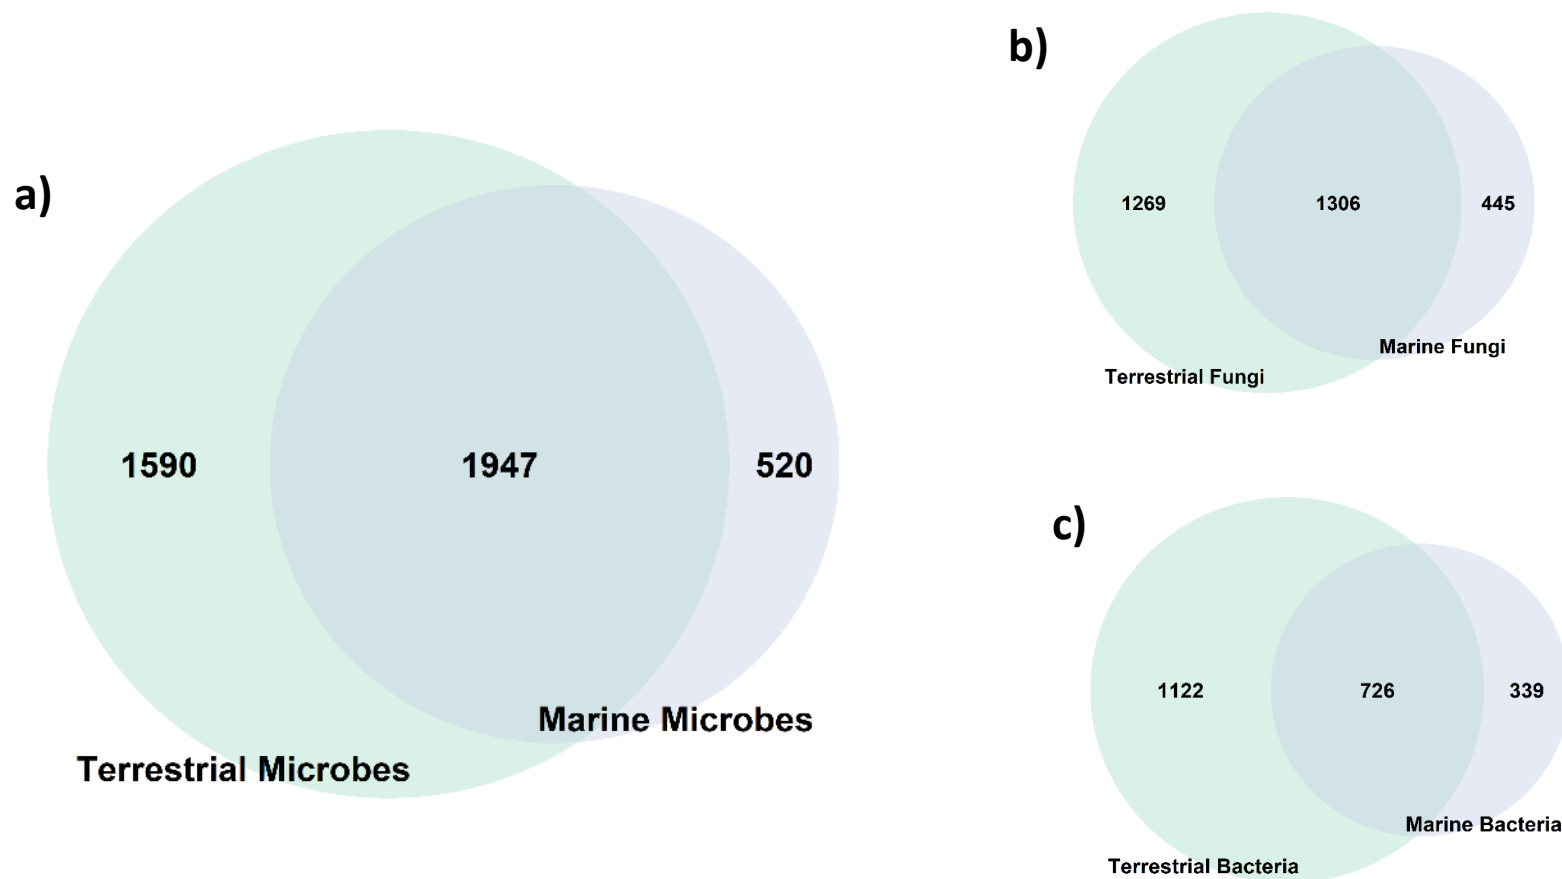

**Fig. S3** a) Overlap between marine (blue) and terrestrial (green) microbial molecular clusters. It shows that 78.9% of the marine natural products clusters are nested amongst terrestrial clusters. Numbers indicate the total number of clusters in each section. b) Overlap between the marine (blue) and terrestrial (green) fungal NPs, with numbers representing clusters. c) Overlap of the marine (blue) and terrestrial (green) bacterial NPs.

Marine Microbial Natural Products and their overlap with Terrestrial Microbial NPs

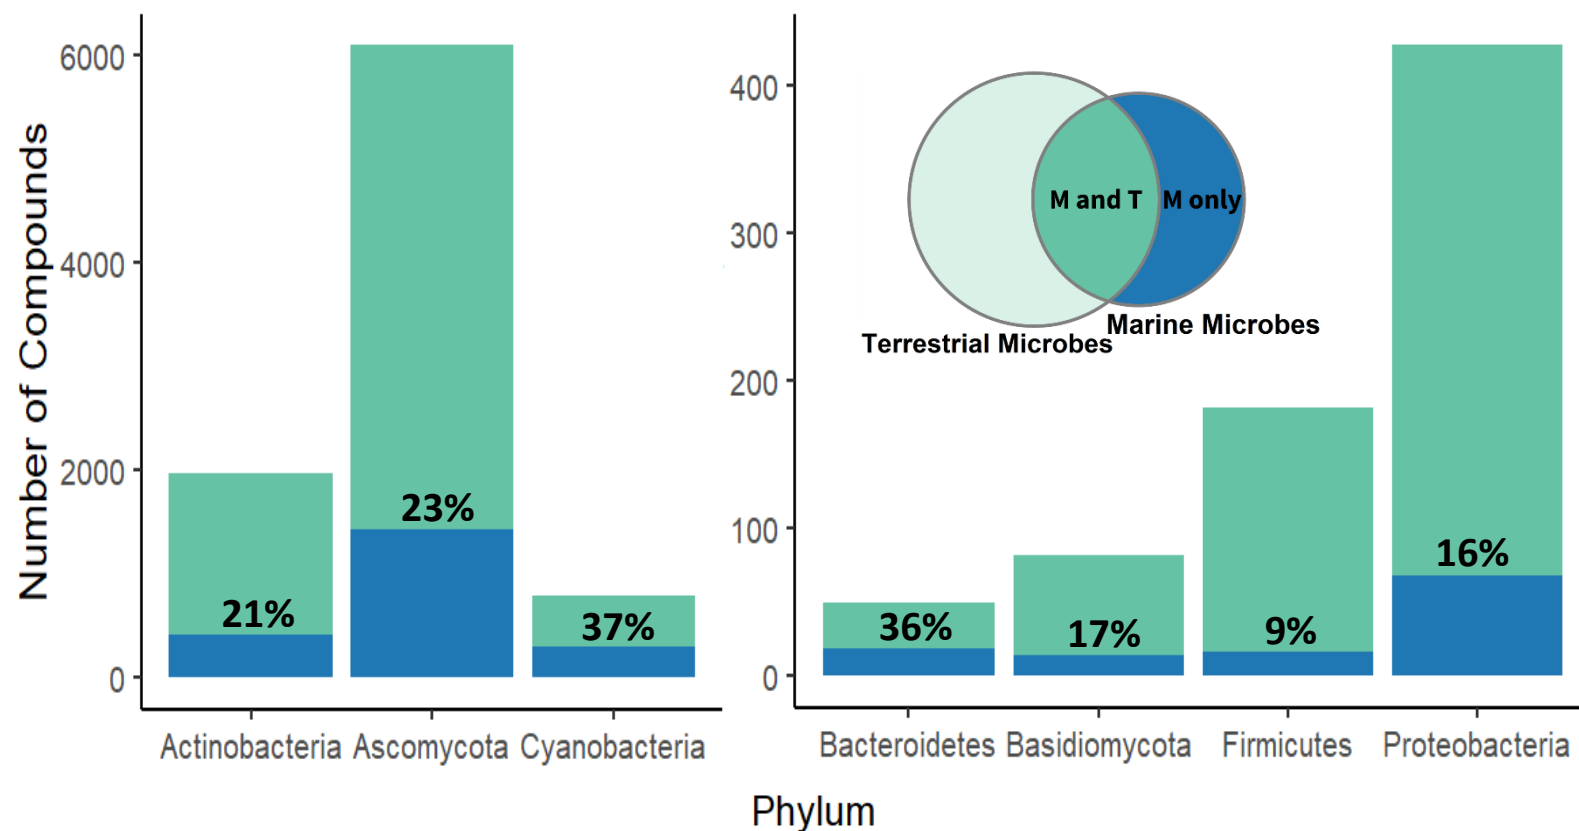

**Fig. S4** Total Number and Percentage of uniquely marine microbial NPs (blue) produced by organisms in different phyla vs marine microbial NPs that overlap with terrestrial microbial NPs (green).

Overlap between the Three Different Groups (Clusters)

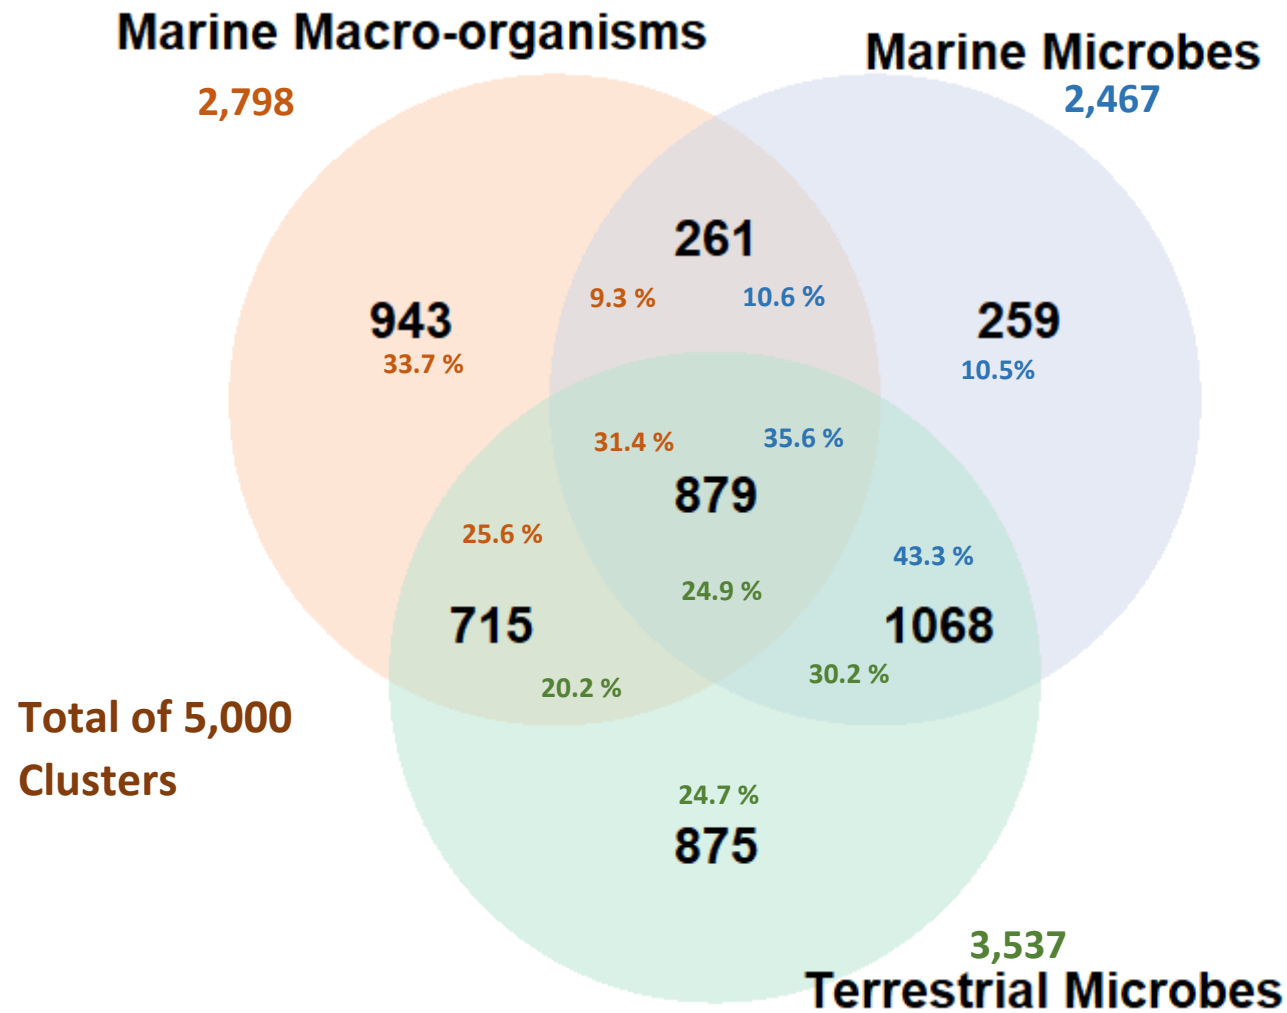

**Fig. S5** Nesting of NPs from marine macro-organisms (orange), marine microorganisms (blue) and terrestrial microorganisms (green). Total number of clusters in each section is given in black. Smaller numbers represent percentages of total clusters for each biota group. Blue numbers for example relate to the percentage of marine microbial NPs clusters in each section as a proportion of the total 2467 marine microbial NP clusters

Overlap between the Three Different Groups (Compounds)

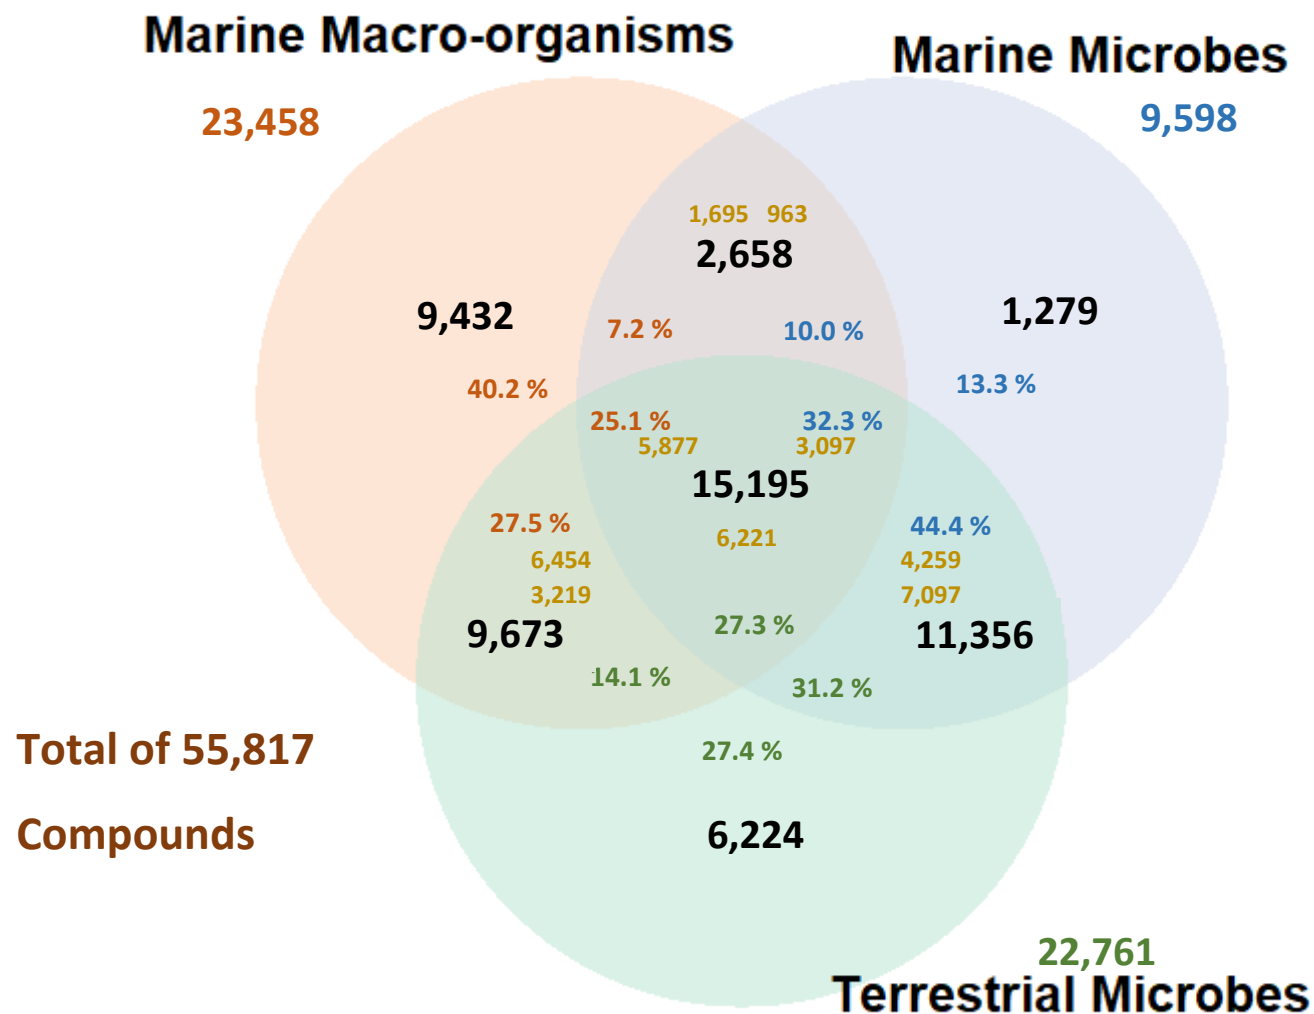

**Fig. S6** Nesting of NPs from marine macro-organisms (orange), marine microorganisms (blue) and terrestrial microorganisms (green). Total number of NPs in each section is given in black. Smaller numbers represent percentages of total NPs for each biota group. Blue numbers for example relate to the percentage of marine microbial NPs in each section as a proportion of the total 9598 marine microbial NPs. The small orange numbers represent total NPs from each biota group in each intersection. For example, 3219 in the terrestrial microorganism/marine macro-organism intersection represents terrestrial microbial NPs.

Overlap between the Three Different Groups (Compounds & Accounting for Halogenation)

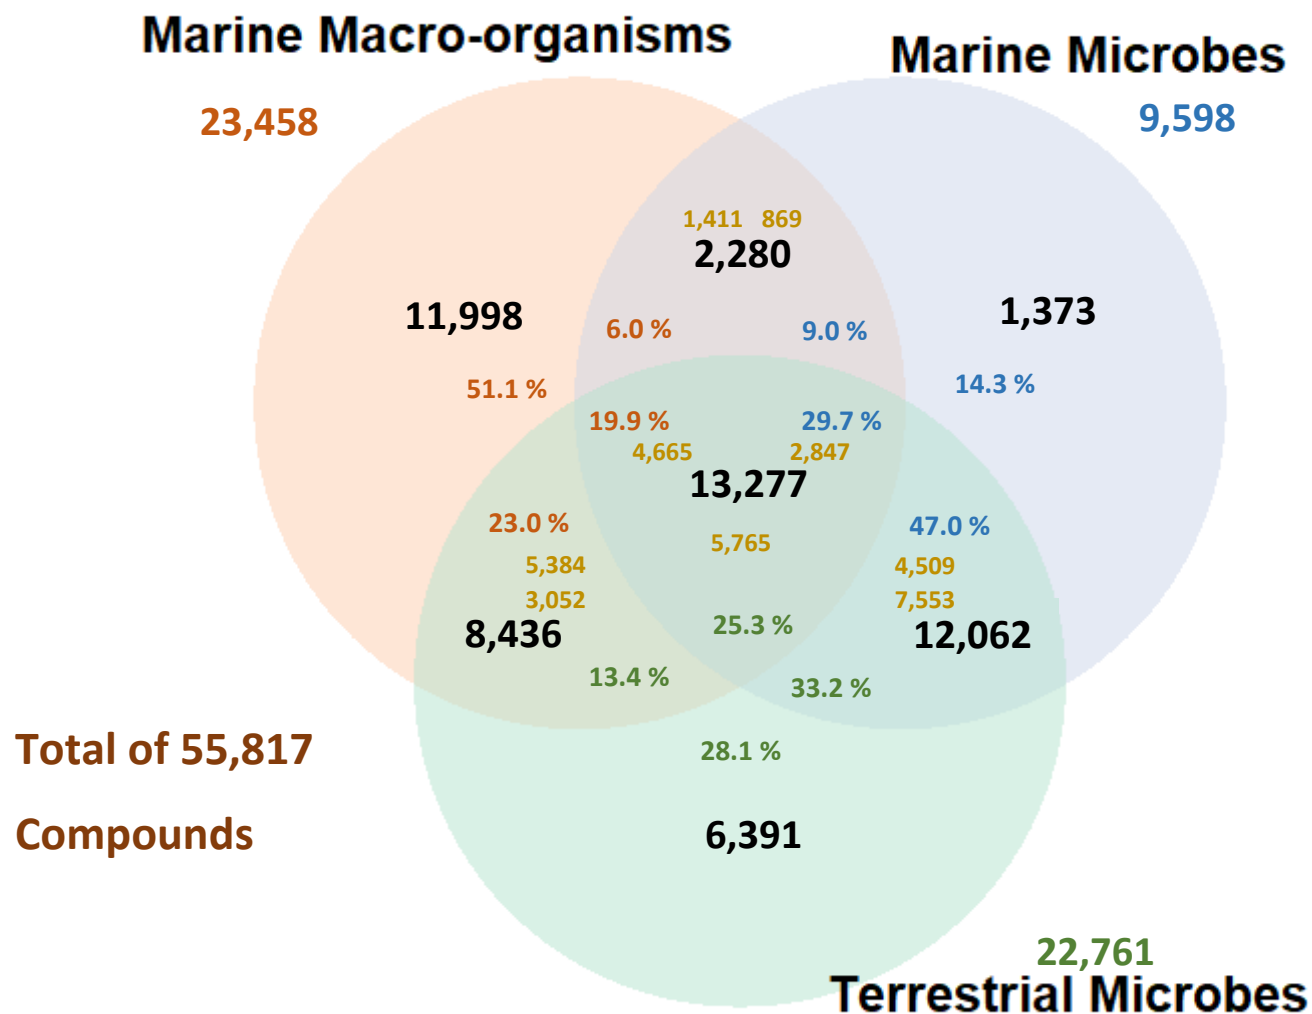

**Fig. S7** Nesting of NPs from marine macro-organisms (orange), marine microorganisms (blue) and terrestrial microorganisms (green) with halogenated NPs are removed from common clusters. Total number of NPs in each section is given in black. Smaller numbers represent percentages of total NPs for each biota group. Blue numbers for example relate to the percentage of marine microbial NPs in each section as a proportion of the total 9598 marine microbial NPs. The small orange numbers represent total NPs from each biota group in each intersection. For example, 3052 in the terrestrial microorganism/marine macro-organism intersection represents terrestrial microbial NPs.



### Overlap of NPs from Marine Macro-organisms

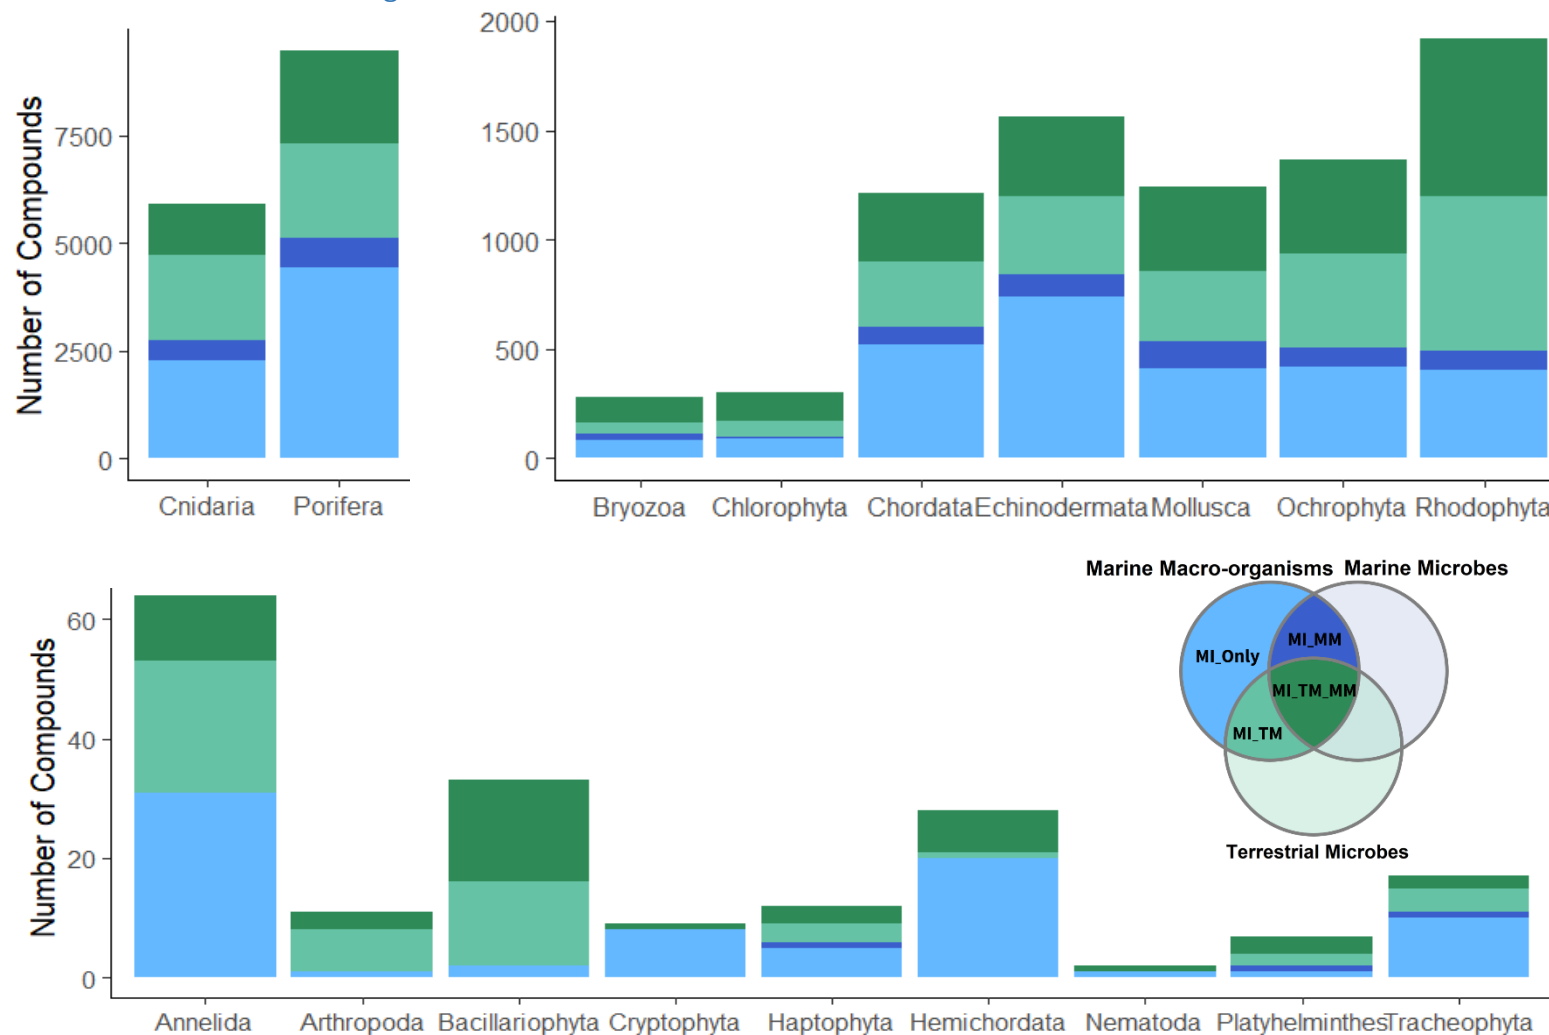

**Fig. S8** Number of NPs isolated from marine macro-organisms, divided into their respective phyla. Colours indicate clusterings with NPs from other groups. NPs that cluster only amongst other marine macro-organisms NPs are represented in light blue, NPs that are nested amongst terrestrial microbial NPs are light green, NPs that are nested among marine microbial NPs are dark blue, and NPs that are nested amongst marine and terrestrial microbial NPs are shown in dark green.

### Overlap of NPs from Marine Macro-organisms (Accounting for Halogenation)

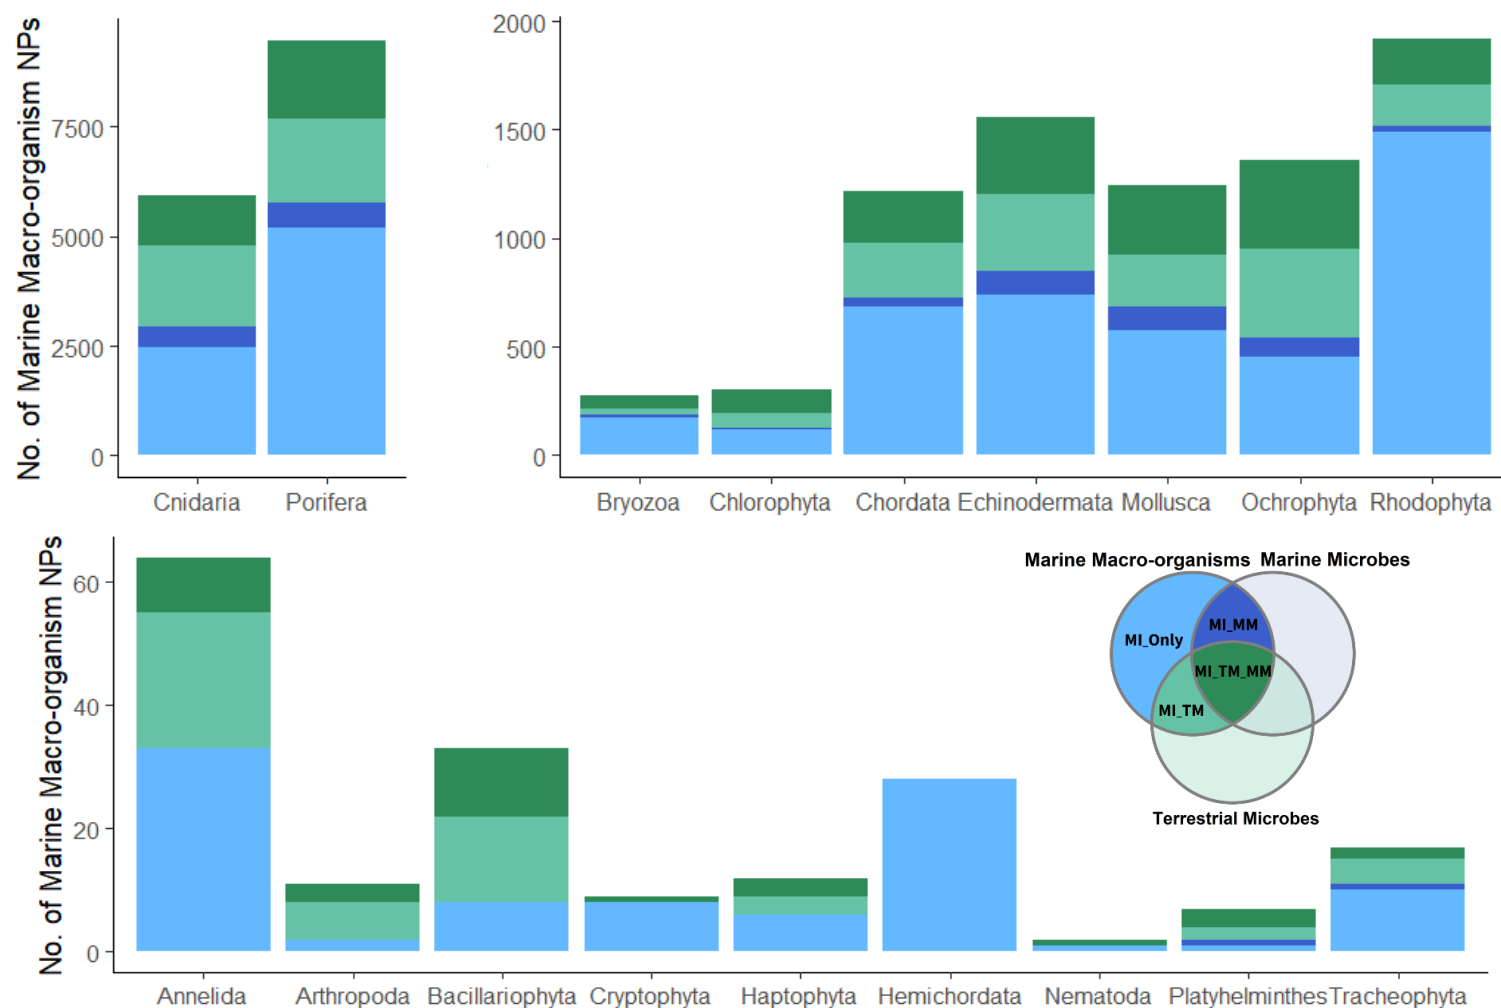

**Fig. S9** Number of NPs isolated from marine macro-organisms, divided into their respective phyla with halogenated NPs removed from common clusters. Different colours represent clusterings with NPs from other groups. NPs that cluster only amongst other marine macro-organisms NPs are represented in light blue, NPs that are nested amongst terrestrial microbial NPs are light green, NPs that are nested among marine microbial NPs are dark blue, and NPs that are nested amongst marine and terrestrial microbial NPs are shown in dark green.

### Overlap of the Marine Microbial NPs

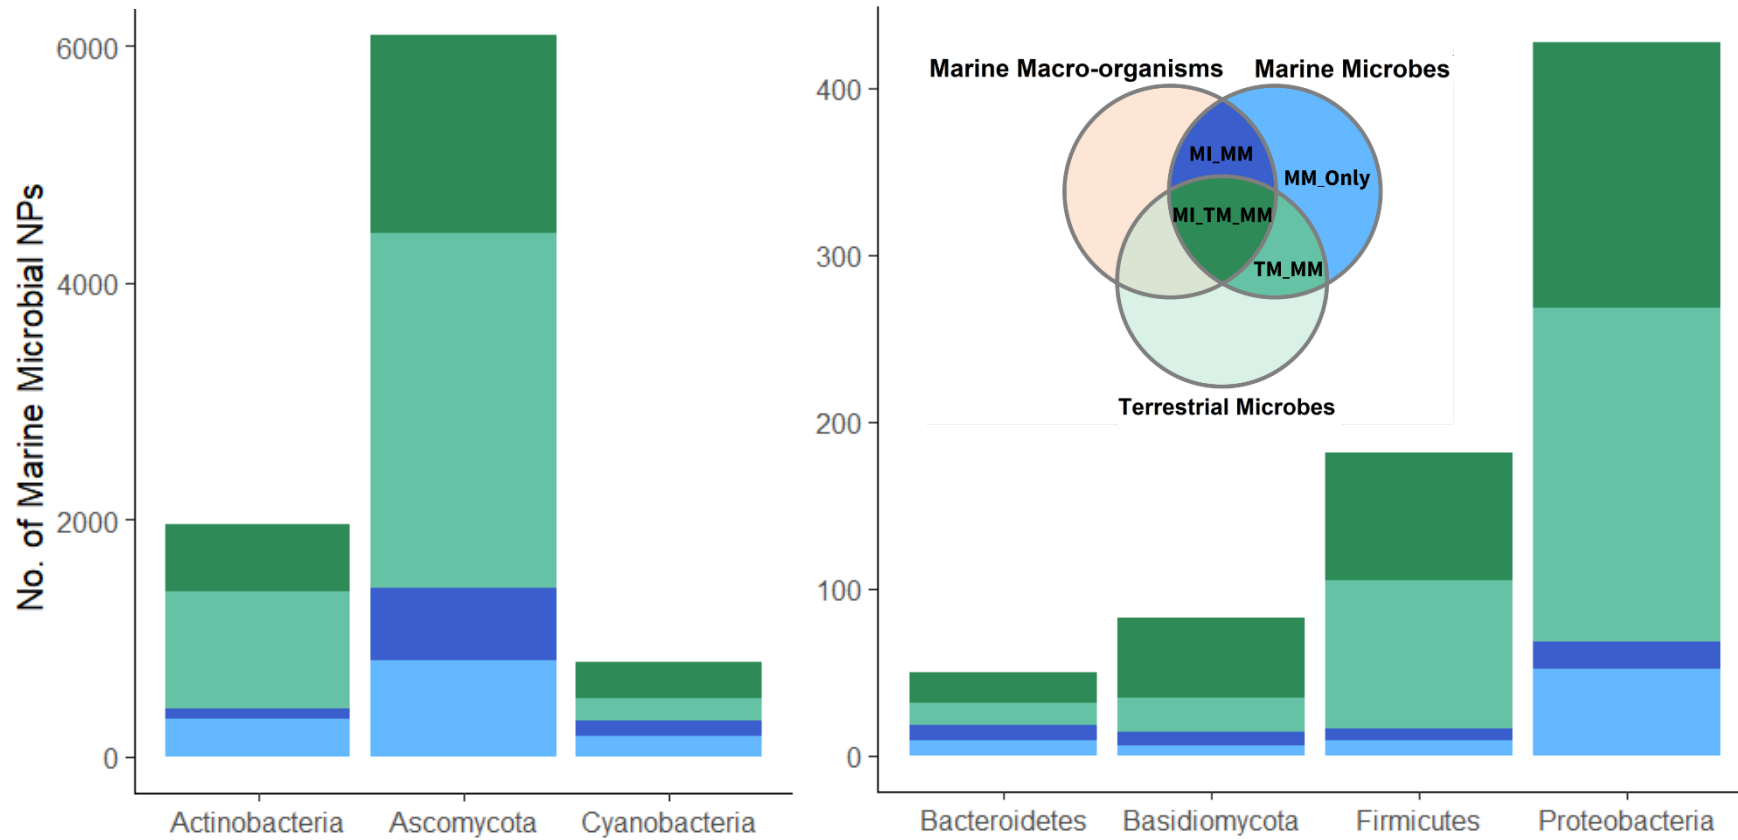

**Fig. S10** Number of NPs isolated from marine microorganisms, divided into their respective phyla. Different colours represent clusterings with NPs from other groups. NPs that cluster only amongst other marine microbial NPs are represented in light blue, NPs that are nested amongst terrestrial microbial NPs are light green, NPs that are nested among NPs from marine macro-organisms are dark blue, and NPs that are nested amongst terrestrial microbial NPs and NPs from marine macro-organisms are shown in dark green.

Closer Look at the Different Overlaps in each Phyla and Genera

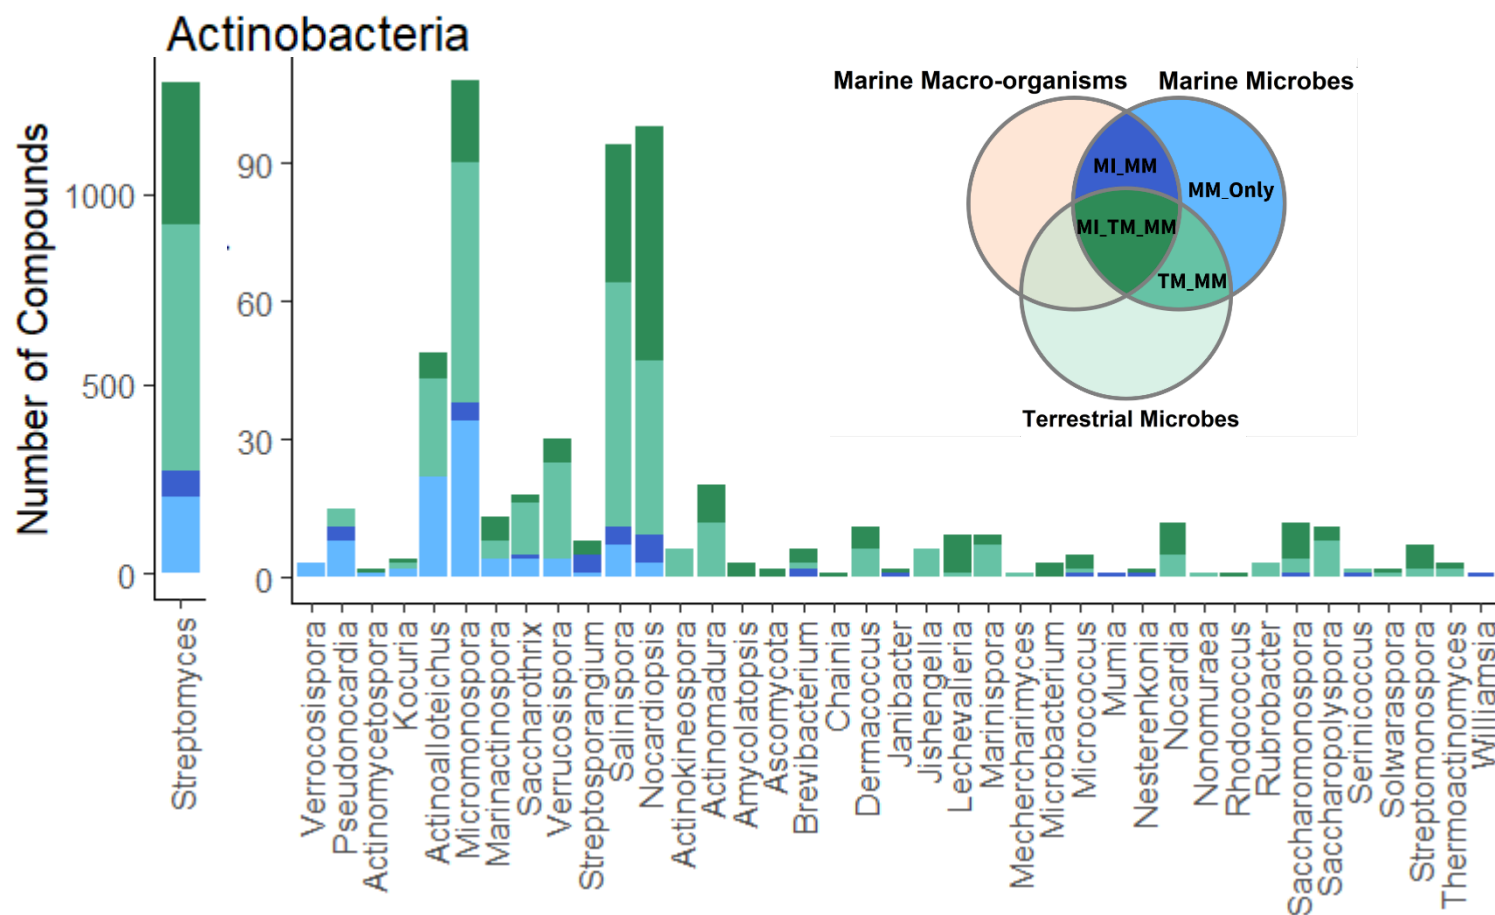

**Fig. S11** Number of NPs isolated from **marine Actinobacteria**. Different colours represent clusterings with NPs from other groups. NPs that cluster only amongst other marine microbial NPs are represented in light blue, NPs that are nested amongst terrestrial microbial NPs are light green, NPs that are nested among NPs from marine macro-organisms are dark blue, and NPs that are nested amongst terrestrial microbial NPs and NPs from marine macro-organisms are shown in dark green.



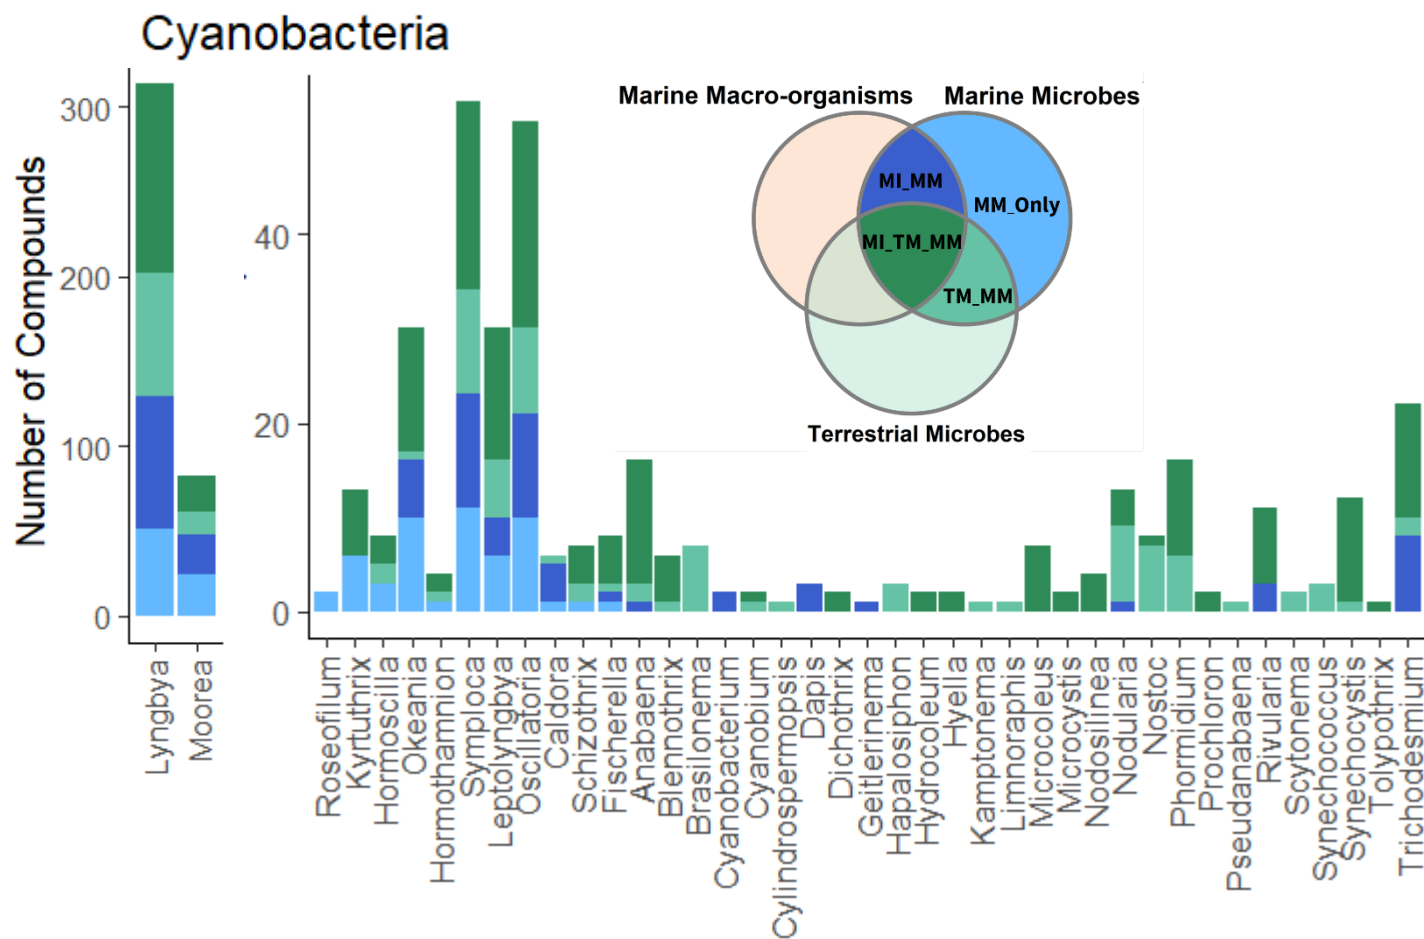

**Fig. S13** Number of NPs isolated from **marine Cyanobacteria**. Different colours represent clusterings with NPs from other groups.. NPs that cluster only amongst other marine microbial NPs are represented in light blue, NPs that are nested amongst terrestrial microbial NPs are light green, NPs that are nested among NPs from marine macro-organisms are dark blue, and NPs that are nested amongst terrestrial microbial NPs and NPs from marine macro-organisms are shown in dark green.

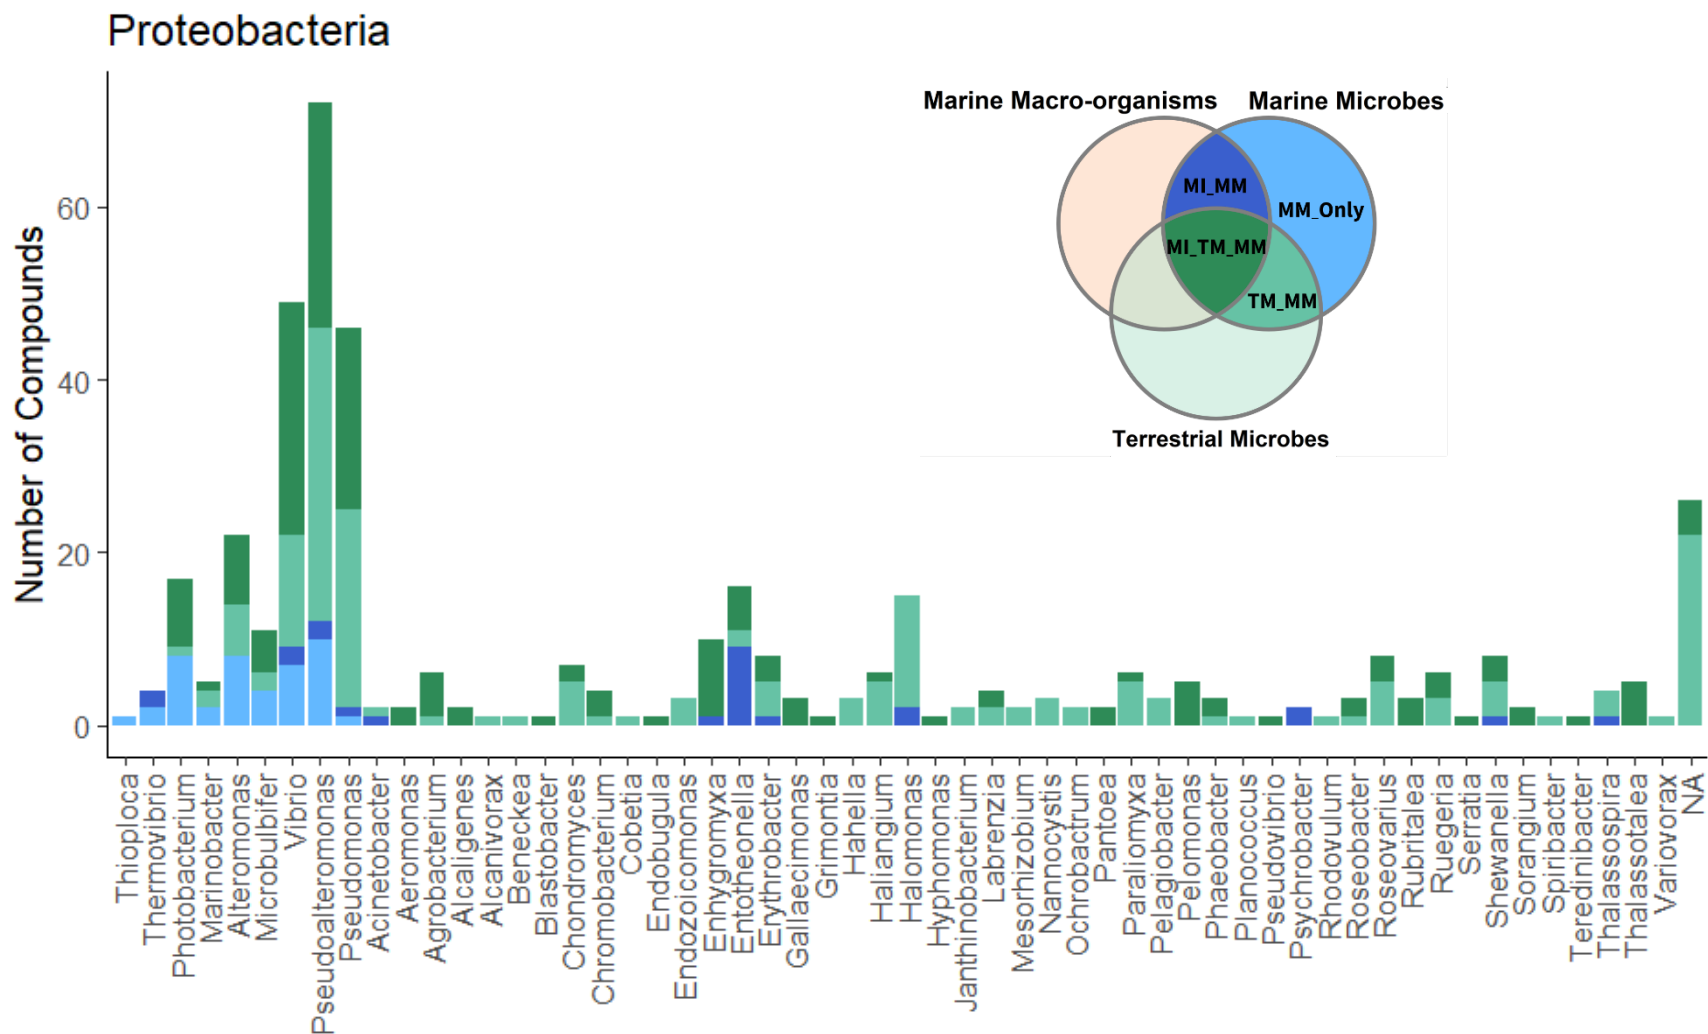

**Fig. S14** Number of NPs isolated from **marine Proteobacteria**. Different colours represent clusterings with NPs from other groups.. NPs that cluster only amongst other marine microbial NPs are represented in light blue, NPs that are nested amongst terrestrial microbial NPs are light green, NPs that are nested among NPs from marine macro-organisms are dark blue, and NPs that are nested amongst terrestrial microbial NPs and NPs from marine macro-organisms are shown in dark green.

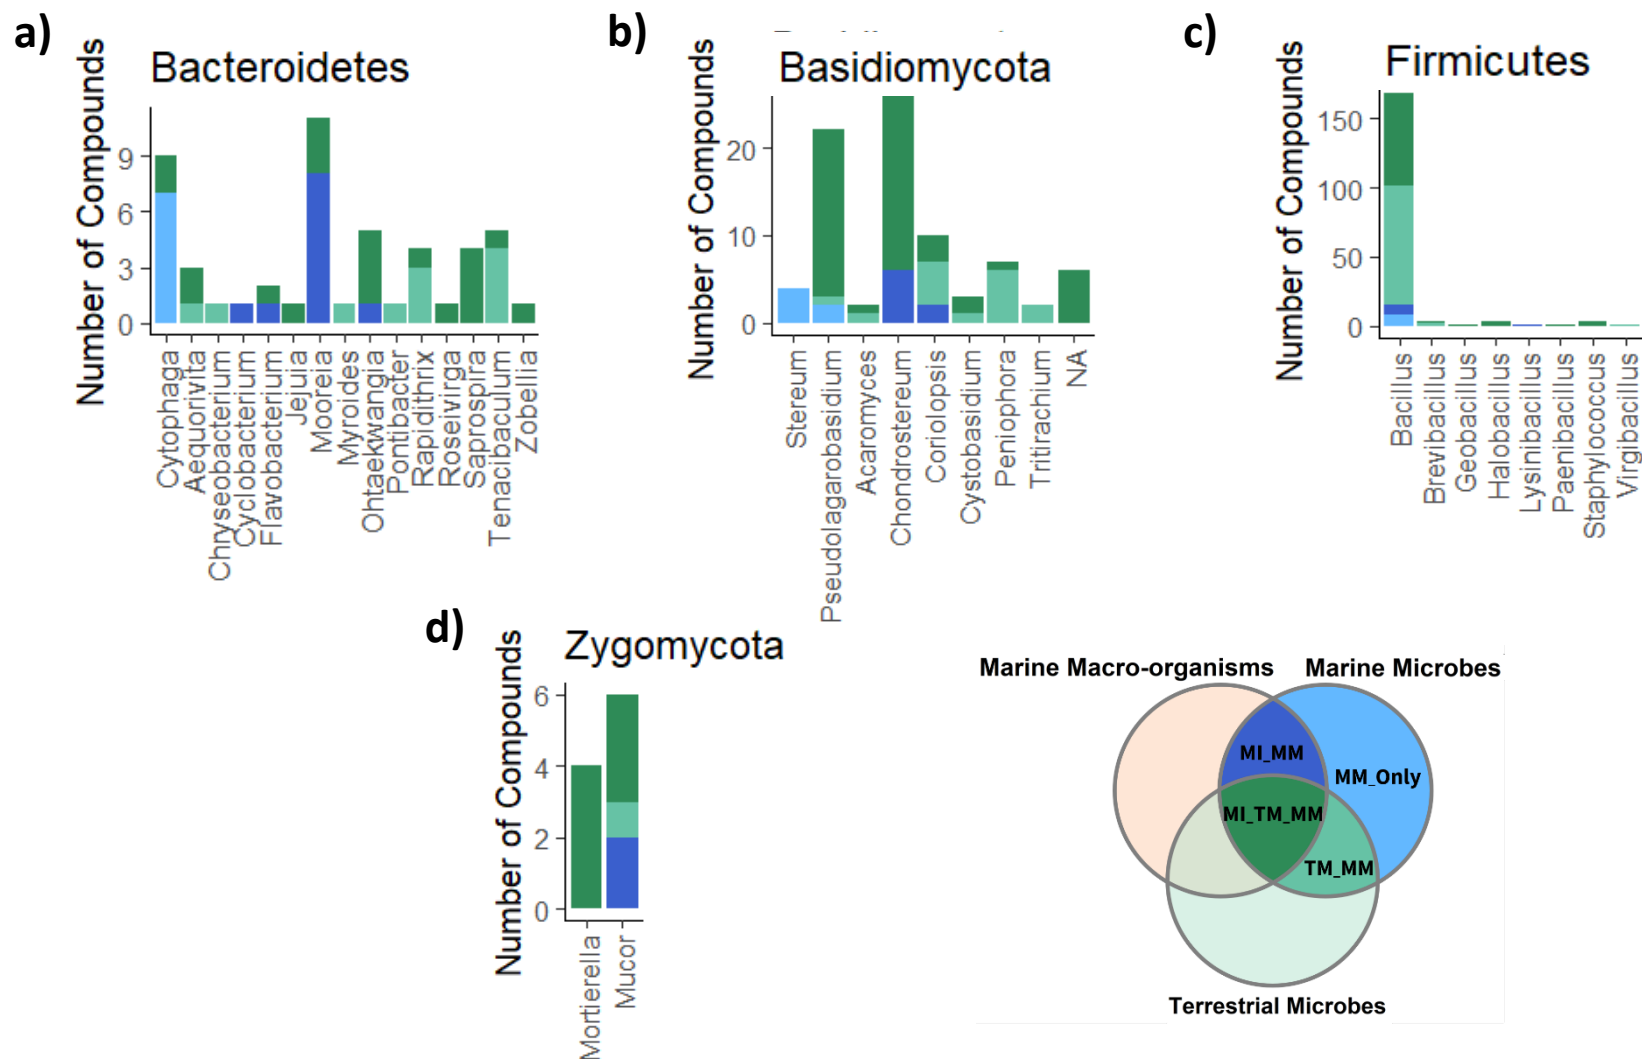

**Fig. S15** Number of NPs isolated from **marine Bacteroidetes a), Basidiomycota b), Frimicutes c) and Zygomycota d).** Different colours represent clusterings with NPs from other groups. NPs that cluster only amongst other marine microbial NPs are represented in light blue, NPs that are nested amongst terrestrial microbial NPs are light green, NPs that are nested among NPs from marine macro-organisms are dark blue, and NPs that are nested amongst terrestrial microbial NPs and NPs from marine macro-organisms are shown in dark green.



## Top Producers of Marine Only Compounds

**Table 1** List of the top producers of marine microbial NPs that do not nest with terrestrial NPs, according to the fingerprint cluster analysis. On the left are the top 20 genera according to the absolute number of marine only NPs and on the right are the top 20 genera ranked by proportion of NPs that cluster only with marine NPs versus total compounds produced in the marine environment by this genus. For proportion calculations, genera that produced less than 5 compounds in total were removed from the list.

| Genus                | # of Marine Only |
|----------------------|------------------|
| Aspergillus          | 217              |
| Streptomyces         | 200              |
| Penicillium          | 188              |
| Moorea               | 58               |
| Micromonospora       | 34               |
| Trichoderma          | 27               |
| Actinoalloteichus    | 22               |
| Phomopsis            | 20               |
| Spiromastix          | 19               |
| Epicoccum            | 17               |
| Lyngbya              | 17               |
| Cladosporium         | 16               |
| Pseudopestalotiopsis | 16               |
| Talaromyces          | 16               |
| Alternaria           | 13               |
| Diaporthe            | 12               |
| Botryotinia          | 11               |
| Eutypella            | 11               |
| Symploca             | 11               |
| Okeania              | 10               |

| Genus                | # of Marine Only | Total # of Molecules | Proportion of Marine Only |
|----------------------|------------------|----------------------|---------------------------|
| Cytophaga            | 7                | 9                    | 0.8                       |
| Pseudopestalotiopsis | 16               | 23                   | 0.7                       |
| Chrysosporium        | 9                | 16                   | 0.6                       |
| Pseudonocardia       | 8                | 15                   | 0.5                       |
| Polyporales          | 4                | 8                    | 0.5                       |
| Spiromastix          | 19               | 39                   | 0.5                       |
| Photobacterium       | 8                | 17                   | 0.5                       |
| Kyrtuthrix           | 6                | 13                   | 0.5                       |
| Actinoalloteichus    | 22               | 49                   | 0.4                       |
| Trichobotrys         | 8                | 18                   | 0.4                       |
| Rhytidhysterion      | 7                | 16                   | 0.4                       |
| Epicoccum            | 17               | 39                   | 0.4                       |
| Hormoscilla          | 3                | 8                    | 0.4                       |
| Alteromonas          | 8                | 22                   | 0.4                       |
| Microbulbifer        | 4                | 11                   | 0.4                       |
| Okeania              | 10               | 30                   | 0.3                       |
| Micromonospora       | 34               | 108                  | 0.3                       |
| Marinactinospora     | 4                | 13                   | 0.3                       |
| Arthrinium           | 9                | 36                   | 0.3                       |
| Pleosporales         | 3                | 12                   | 0.3                       |

## World Maps

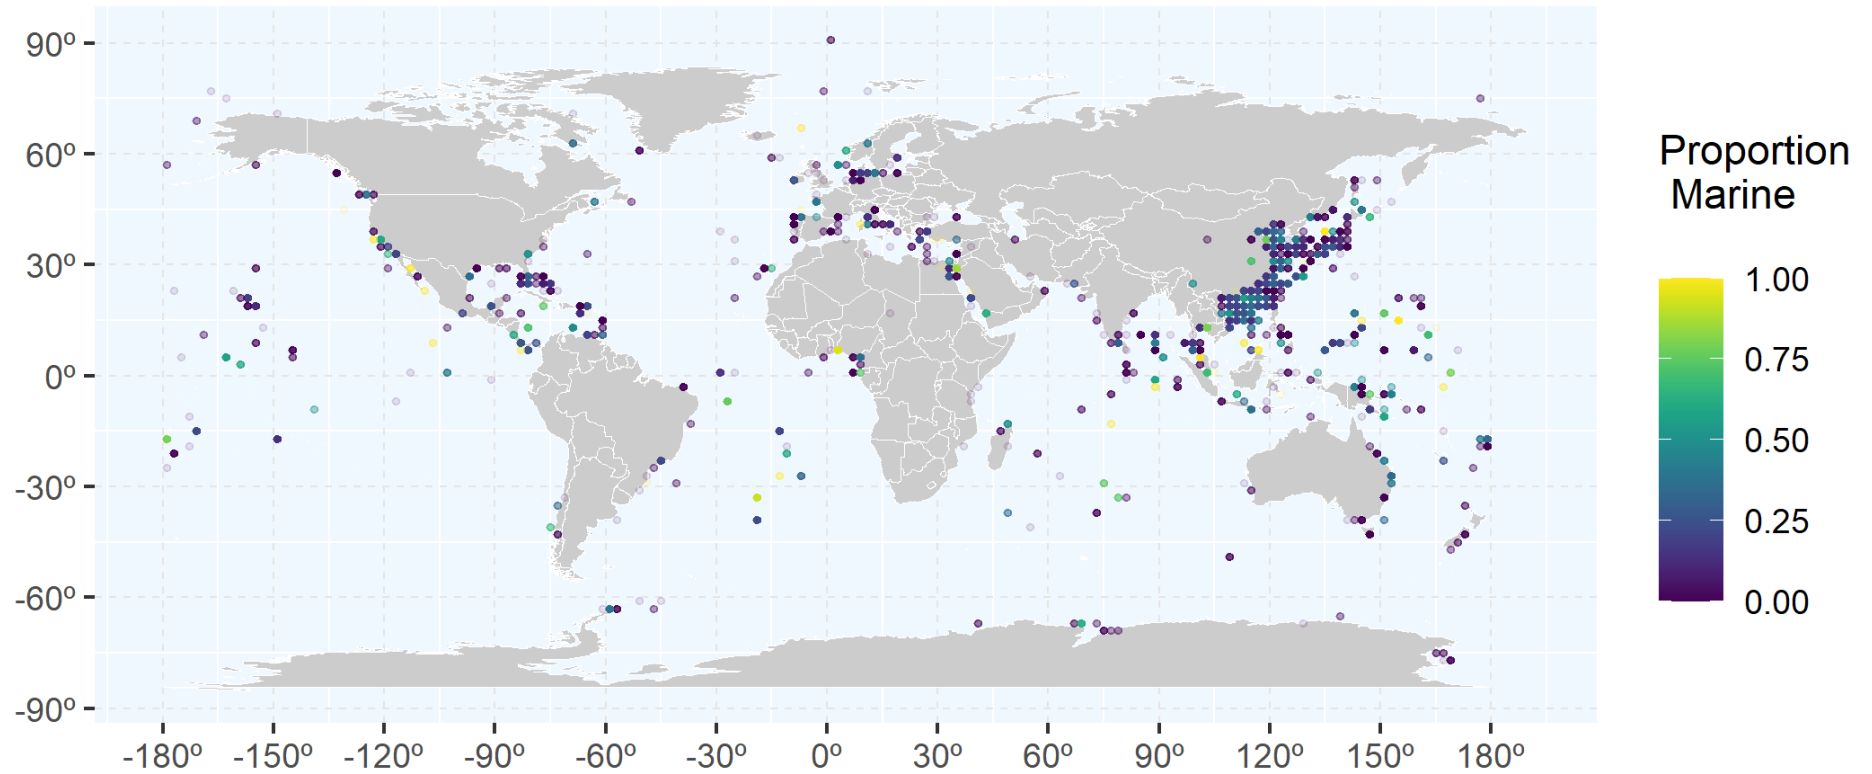

**Fig. S16** World map, showing the distribution of the 8,577 marine microbial NPs that have reported coordinates for their microorganism collection. The colours show the proportion of marine microbial NPs found at a specific location ( $2^\circ \times 2^\circ$  grid cell) that are unique to the marine environment and don't cluster with terrestrial NPs, according to the fingerprint cluster analysis. The number of NPs found at each location varied substantially, and to represent low numbers of NPs at a location, more transparent dots ( $\log_{10}$  scale) have been used.

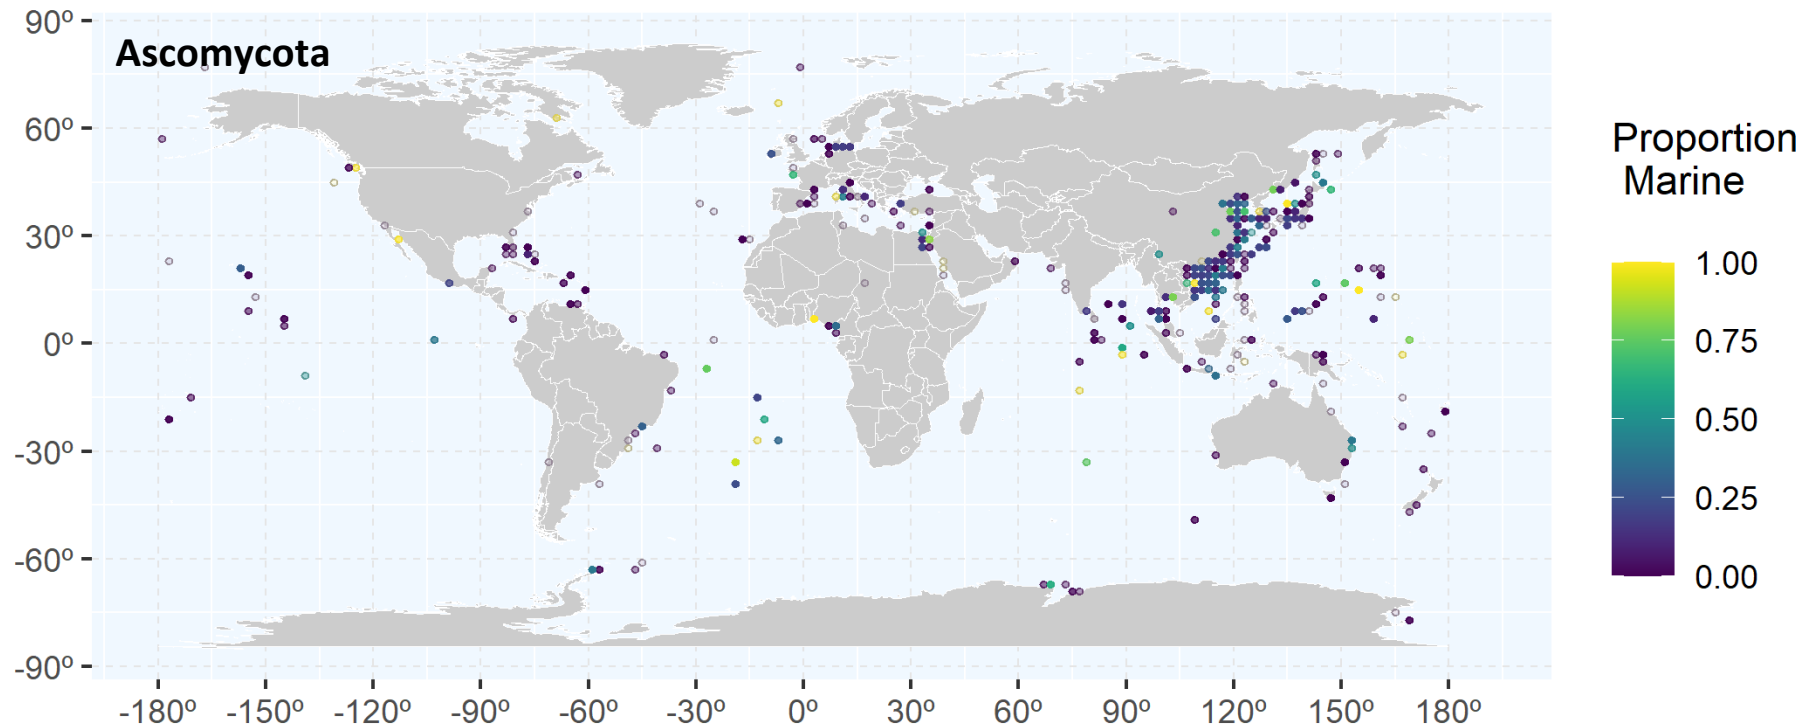

**Fig. S17** World map, showing the distribution of the 5,626 marine microbial NPs isolated from Ascomycota that have collection coordinates reported for the microorganism. The colours show the proportion of marine microbial NPs found at a specific location (2° x 2° grid cell) that are unique to the marine environment and don't cluster with terrestrial NPs, according to the fingerprint cluster analysis. The number of NPs found at each location varied substantially, and to represent low numbers of NPs at a location, more transparent dots (log10 scale) have been used.

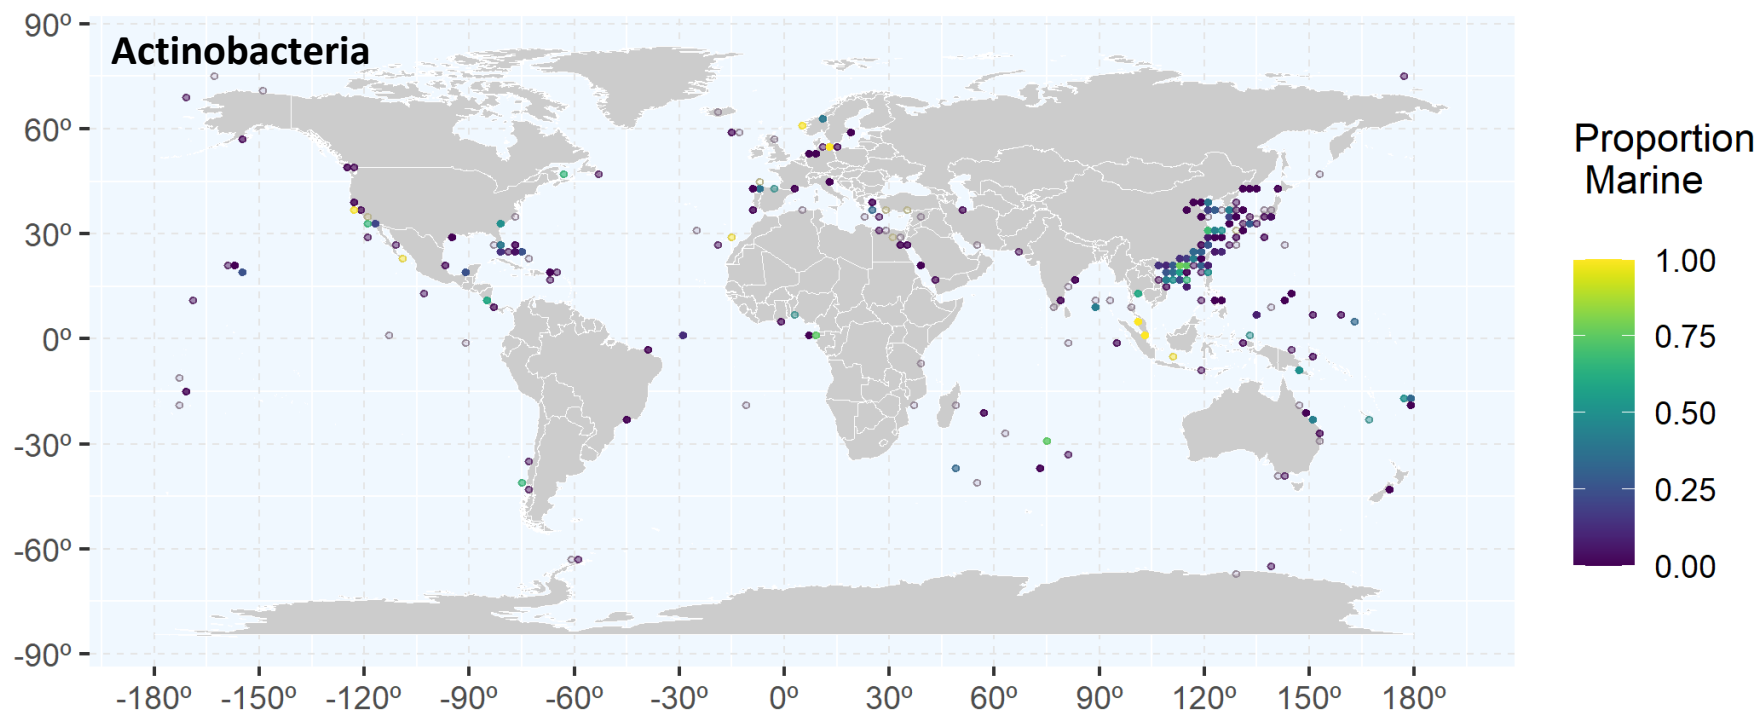

**Fig. S18** World map, showing the distribution of the 1,659 marine microbial NPs isolated from Actinobacteria that have coordinates reported for the microorganism collection. The colours show the proportion of marine microbial NPs found at a specific location ( $2^\circ \times 2^\circ$  grid cell) that are unique to the marine environment and don't cluster with terrestrial NPs, according to the fingerprint cluster analysis. The number of NPs found at each location varied substantially, and to represent low numbers of NPs at a location, more transparent dots (log<sub>10</sub> scale) have been used.

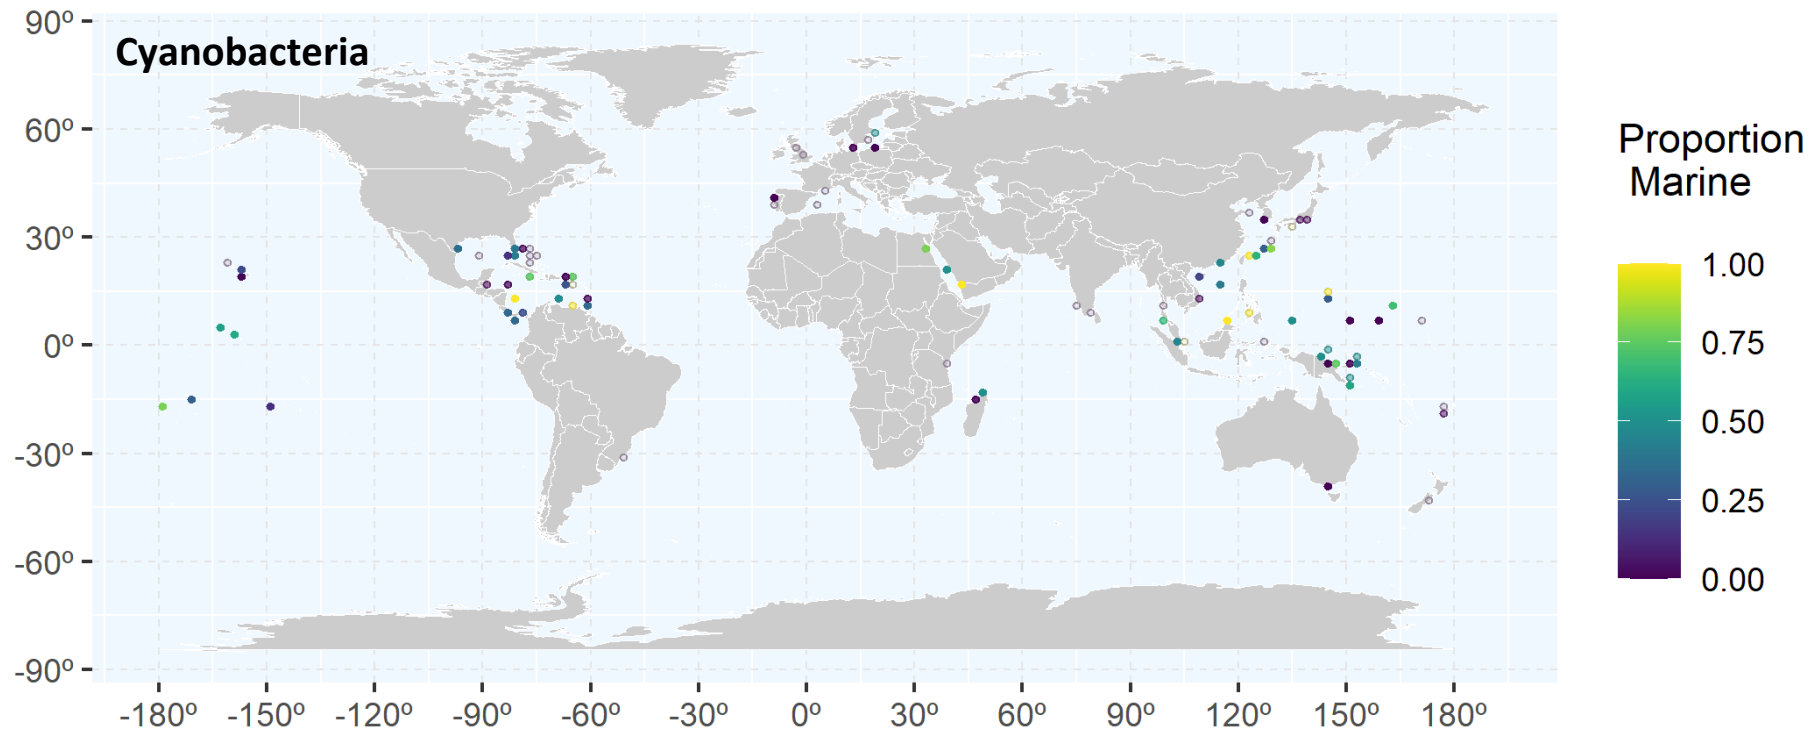

**Fig. S19** World map, showing the distribution of the 734 marine microbial NPs isolated from Cyanobacteria that have reported coordinates for microorganism collection. The colours show the proportion of marine microbial NPs found at a specific location ( $2^\circ \times 2^\circ$  grid cell) that are unique to the marine environment and don't cluster with terrestrial NPs, according to the fingerprint cluster analysis. The number of NPs found at each location varied substantially, and to represent low numbers of NPs at a location, more transparent dots (log<sub>10</sub> scale) have been used.

## Cluster Analysis on PubChem Fingerprint (5000 Clusters)

Overlap Between Marine and Terrestrial Microbial NPs

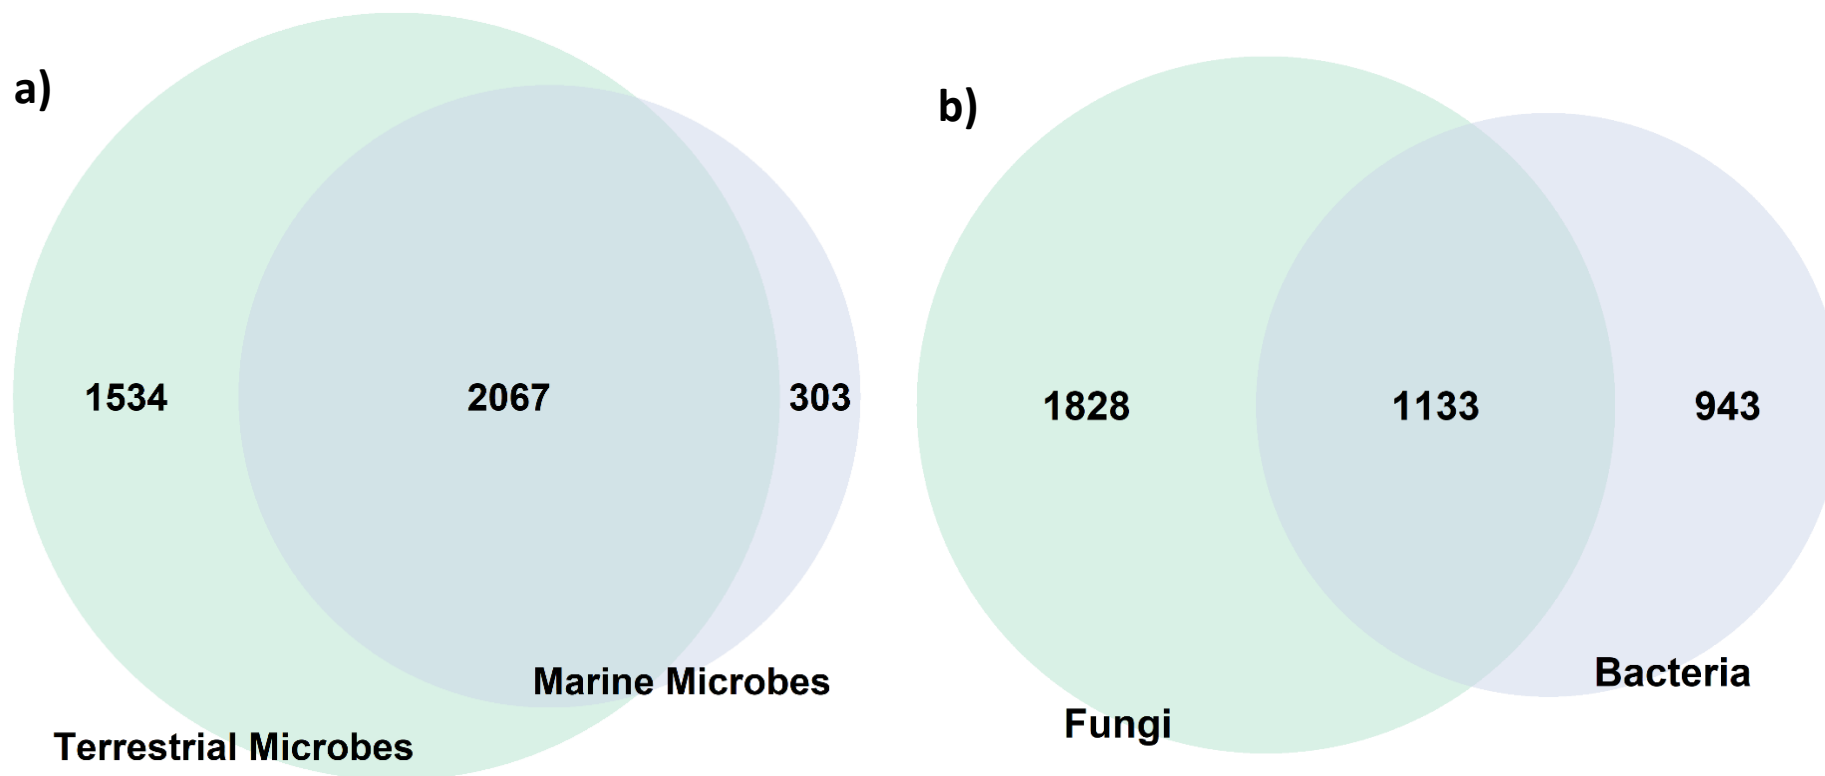

**Fig. S20** a) Overlap between marine (blue) and terrestrial (green) microbial molecular clusters. It shows that 78.9% of the marine natural products clusters are nested amongst terrestrial clusters. Numbers indicate the total number of clusters in each section. b) Overlap between the marine and terrestrial fungal NPs (green) and bacterial NPs (blue).

Marine Microbial Natural Products and their overlap with Terrestrial Microbial NPs

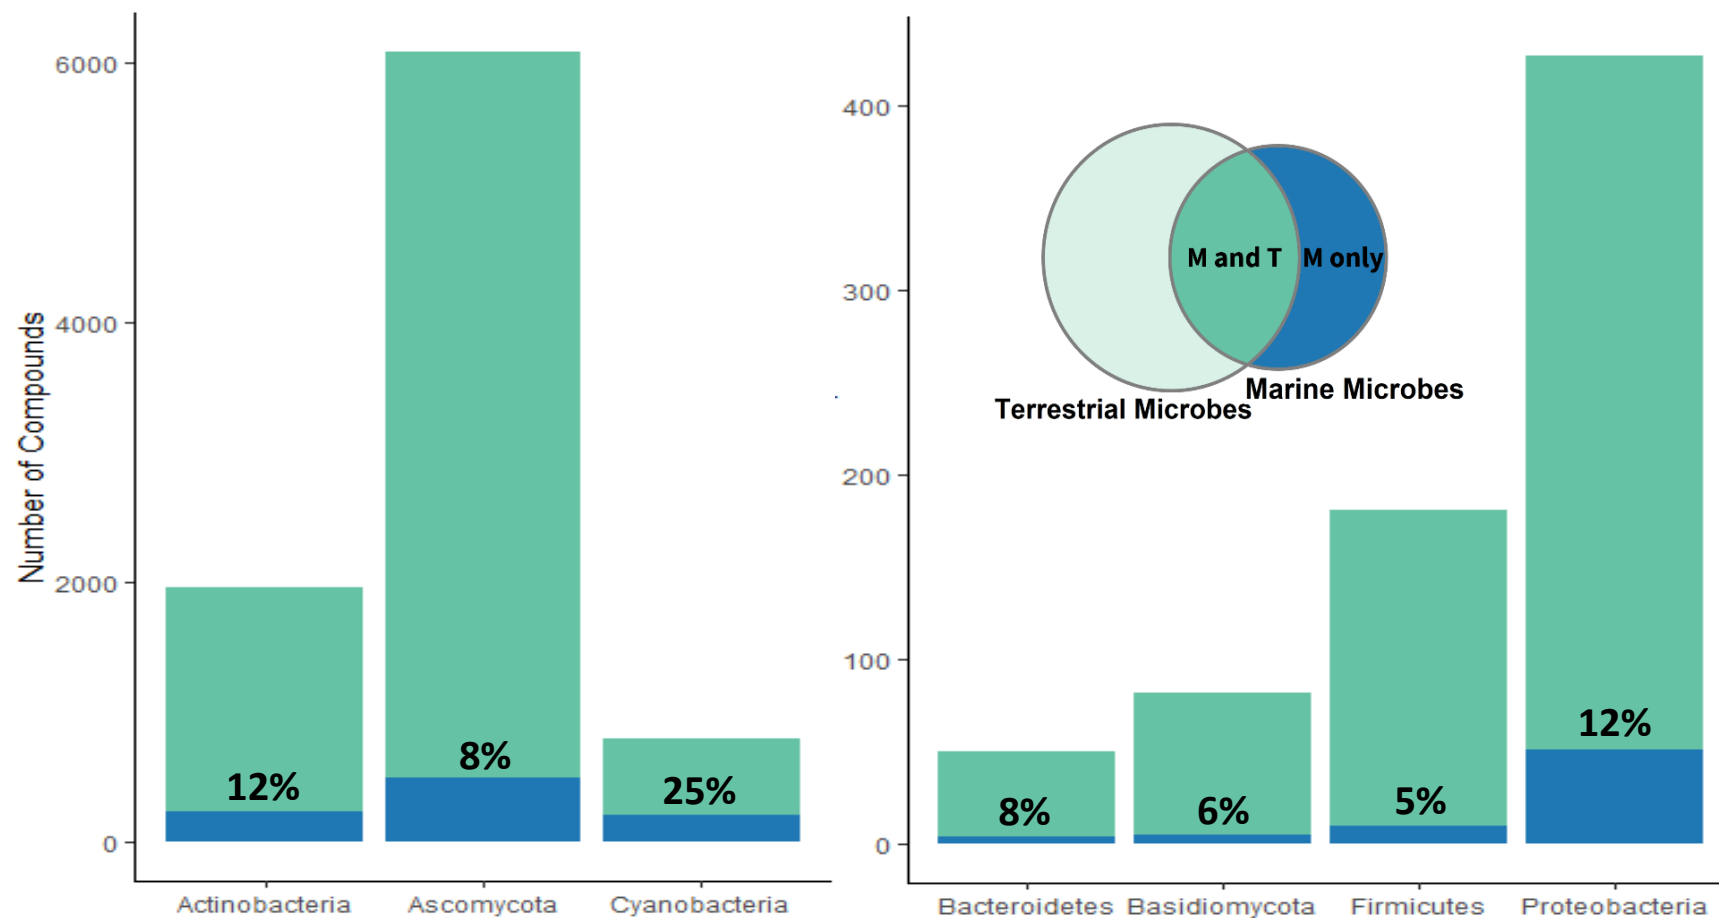

**Fig. S21** Total number and percentage of uniquely marine microbial NPs (blue) produced by organisms in different phyla vs marine microbial NPs that overlap with terrestrial microbial NPs (green).

Overlap between the Three Different Groups (Clusters)

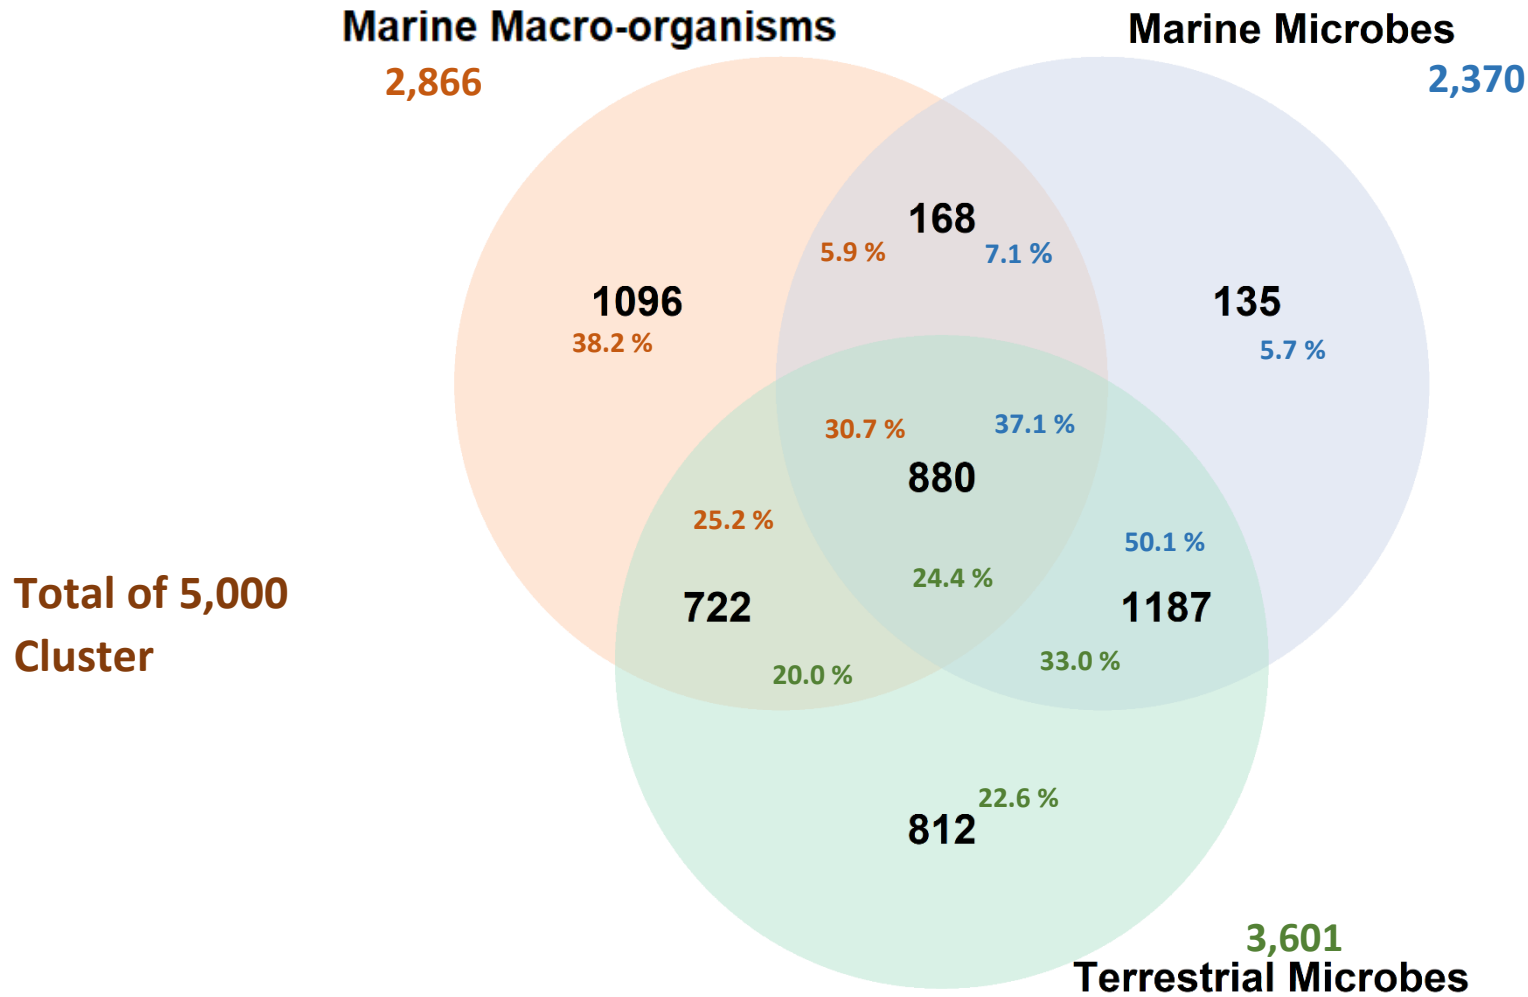

**Fig. S22** Nesting of NP clusters from marine macro-organisms (orange), marine microorganisms (blue) and terrestrial microorganisms (green). Total number of clusters in each section is given in black. Smaller numbers represent percentages of total clusters for each biota group. Blue numbers for example relate to the percentage of marine microbial NPs clusters in each section as a proportion of the total 2370 marine microbial NP clusters



Overlap between the Three Different Groups (Compounds)

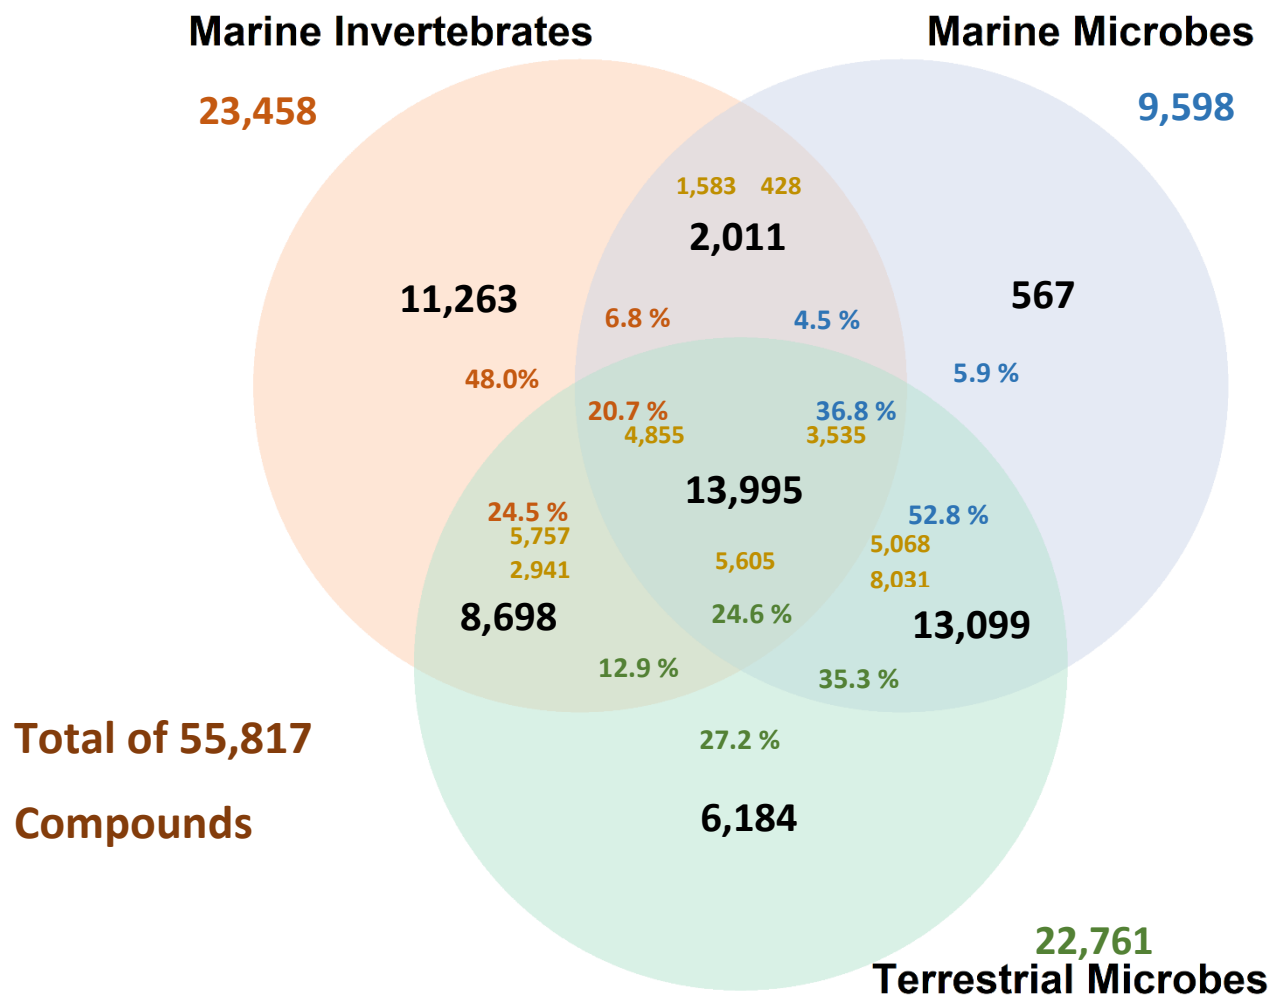

**Fig. S23** Nesting of NPs from marine macro-organisms (orange), marine microorganisms (blue) and terrestrial microorganisms (green). Total number of NPs in each section is given in black. Smaller numbers represent percentages of total NPs for each biota group. Blue numbers for example relate to the percentage of marine microbial NPs in each section as a proportion of the total 9598 marine microbial NPs. The small orange numbers represent total NPs from each biota group in each intersection. For example, 2941 in the terrestrial microorganism/marine macro-organism intersection represents terrestrial microbial NPs.

## Murcko Scaffold Analysis (9195 Scaffolds)

Overlap Between Marine and Terrestrial Microbial NPs

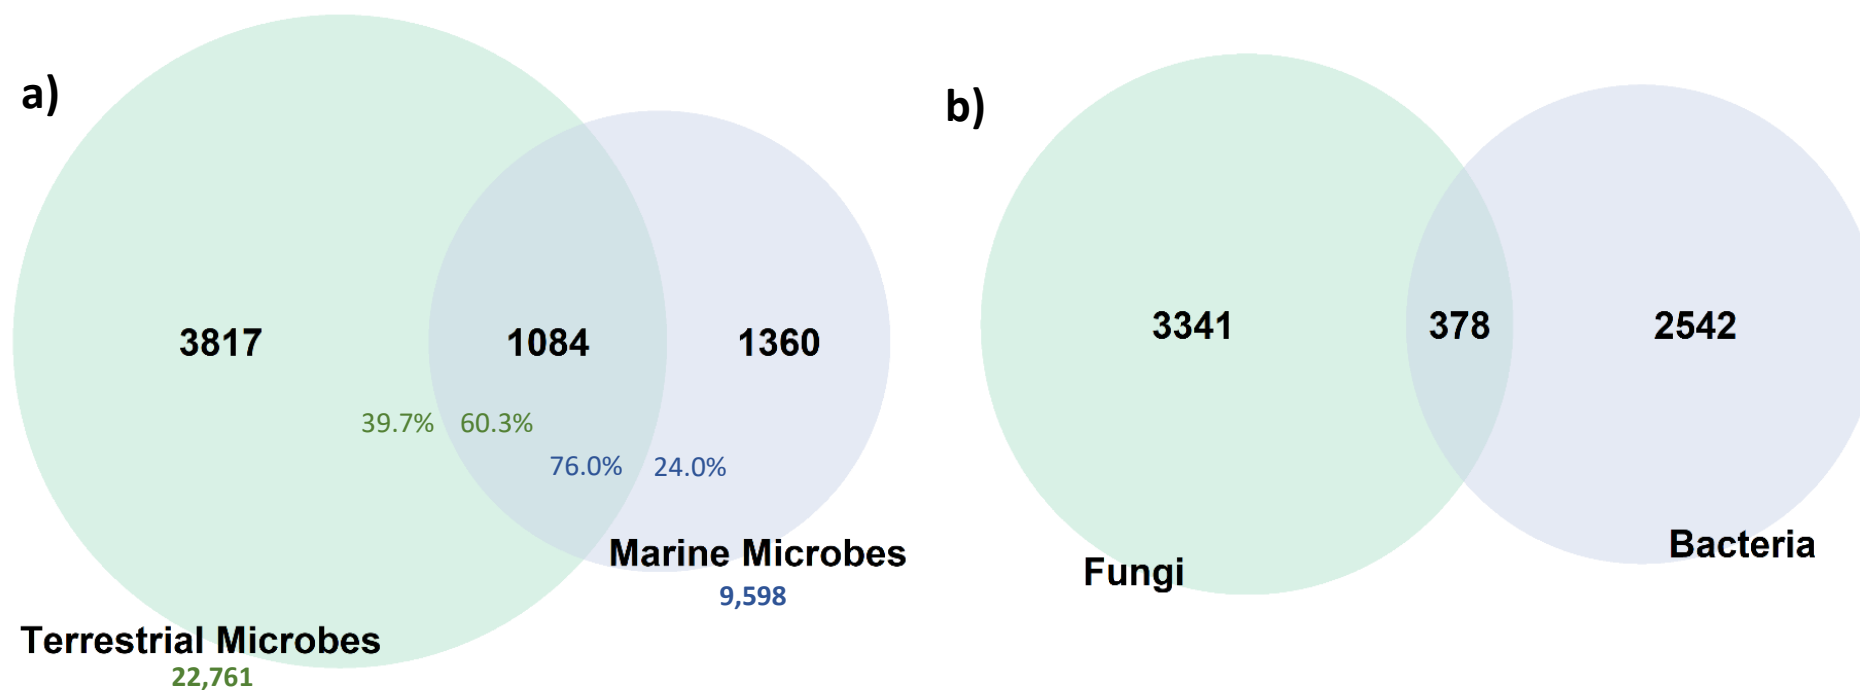

**Fig. S24** a) Overlap between marine (blue) and terrestrial (green) microbial molecular scaffolds. It shows that 78.9% of the marine NP scaffolds are nested amongst terrestrial scaffolds. Numbers indicate the total number of scaffolds in each section. b) Overlap between the marine and terrestrial fungal NPs (green) and bacterial NPs (blue). Jaccard index shows that there is only a 6% overlap between bacterial and fungal NPs.

Marine Microbial NPs and their overlap with Terrestrial Microbial NPs

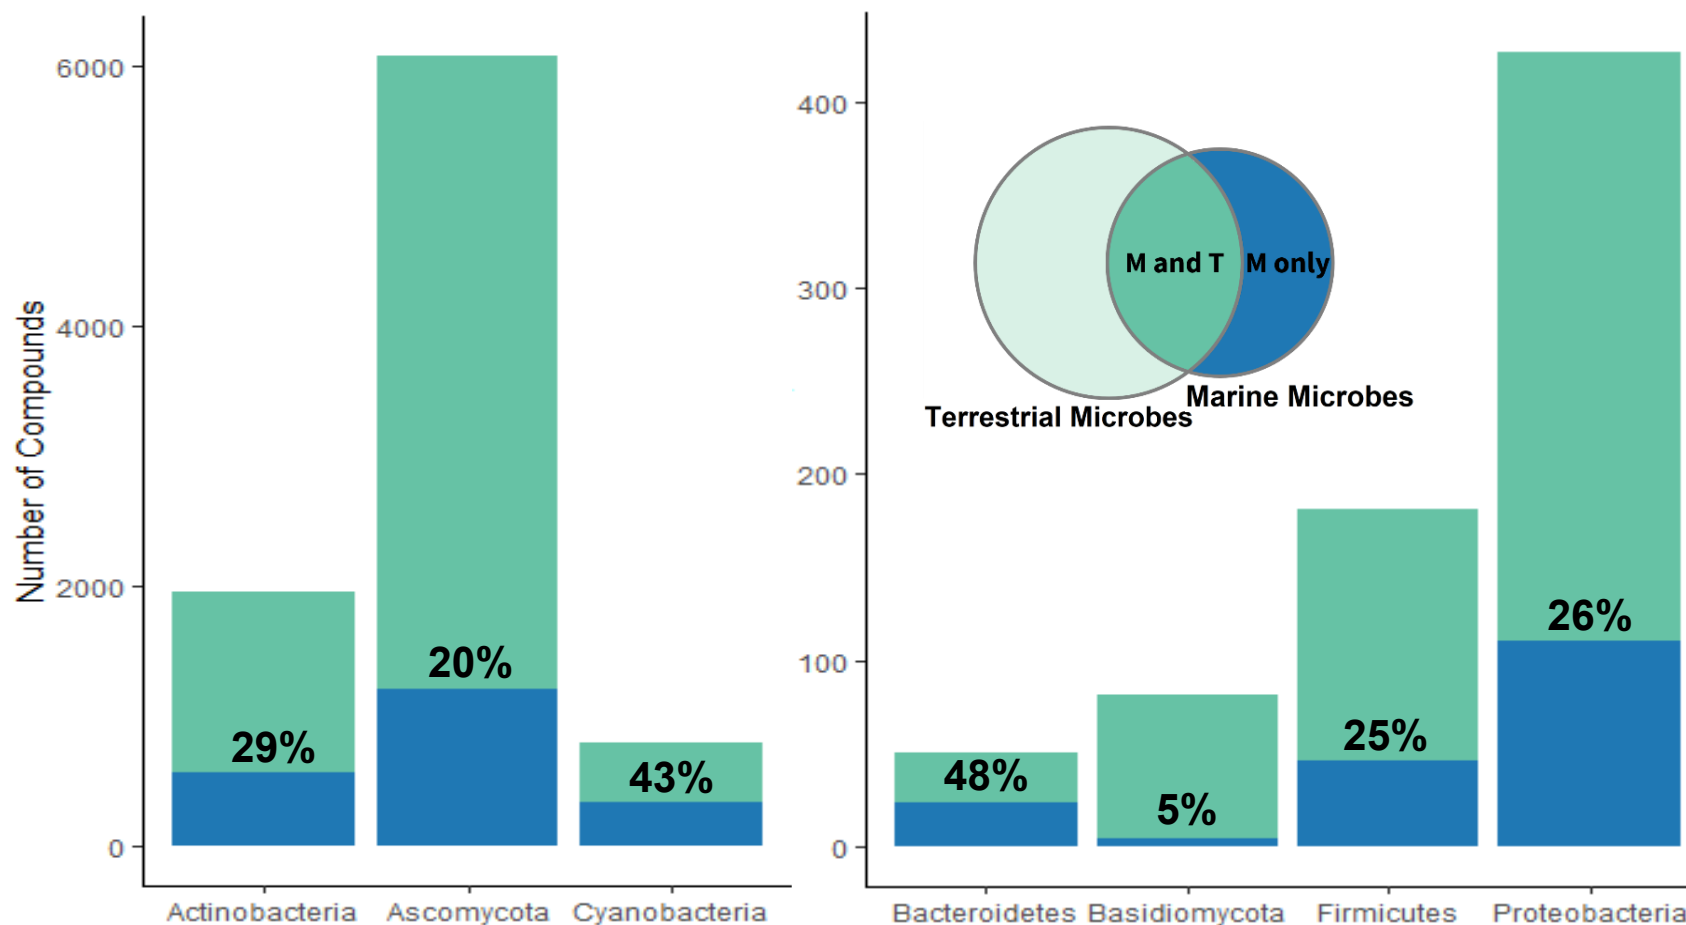

**Fig. S25** Total number and percentage of uniquely marine microbial NPs (blue) produced by microbes from different phyla vs marine microbial NPs that overlap with terrestrial microbial NPs (green).

Overlap between the Three Different Groups (Scaffolds)

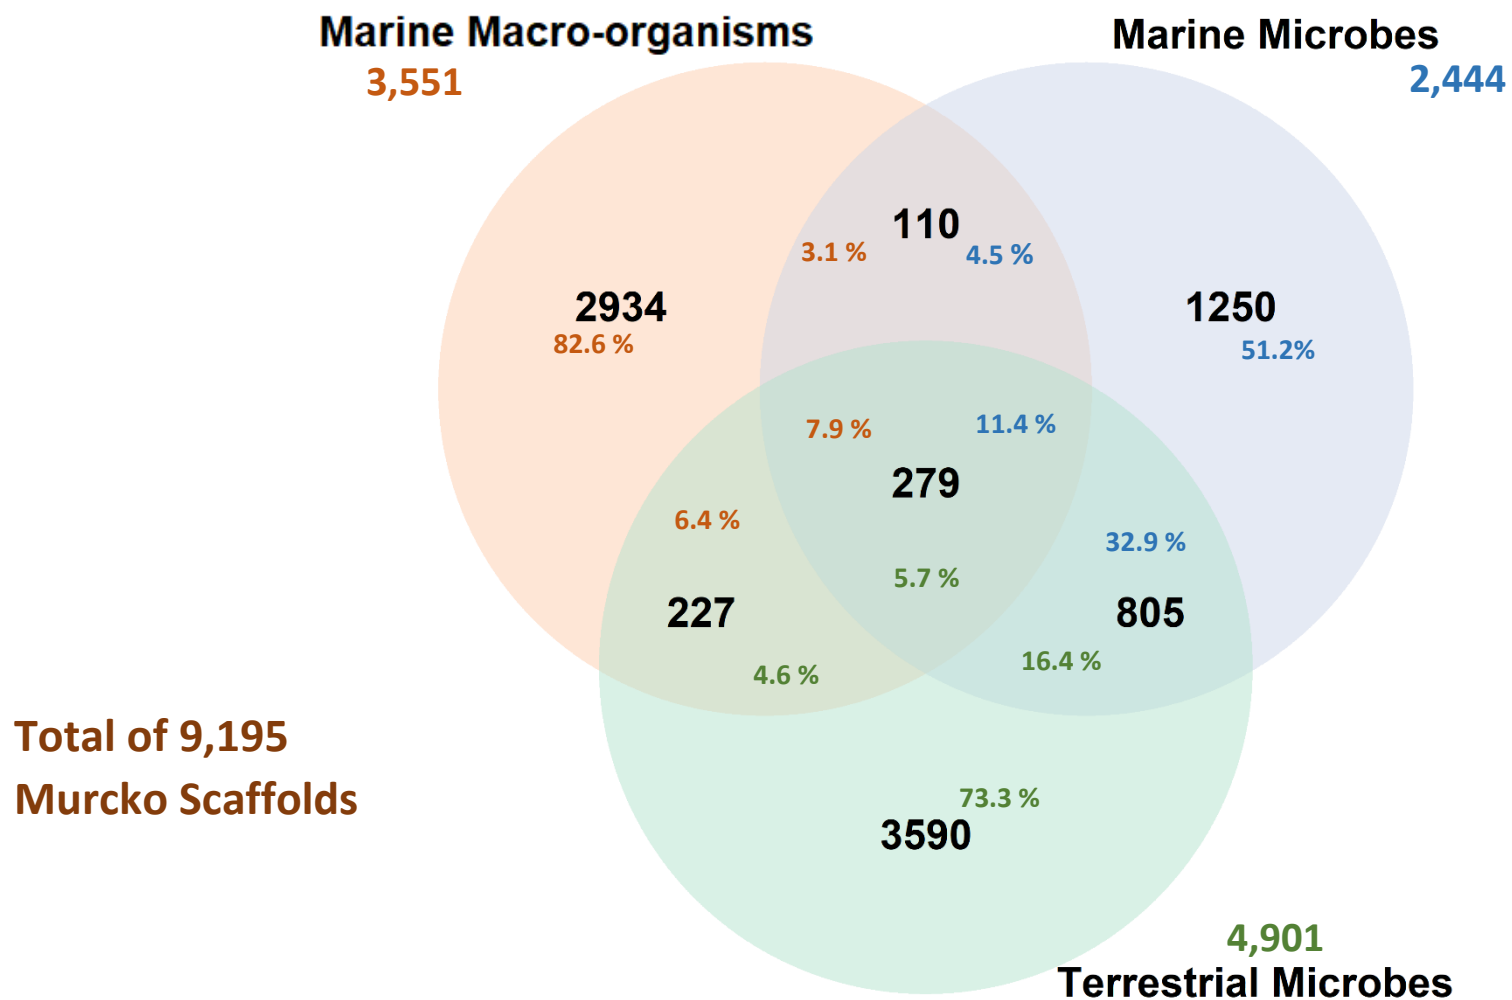

**Fig. S26** Nesting of NP scaffolds from marine macro-organisms (orange), marine microorganisms (blue) and terrestrial microorganisms (green). Total number of scaffolds in each section is given in black. Smaller numbers represent percentages of total scaffolds for each biota group. Blue numbers for example relate to the percentage of marine microbial NPs scaffolds in each section as a proportion of the total 2444 marine microbial NP scaffolds

Overlap between the Three Different Groups (Compounds)

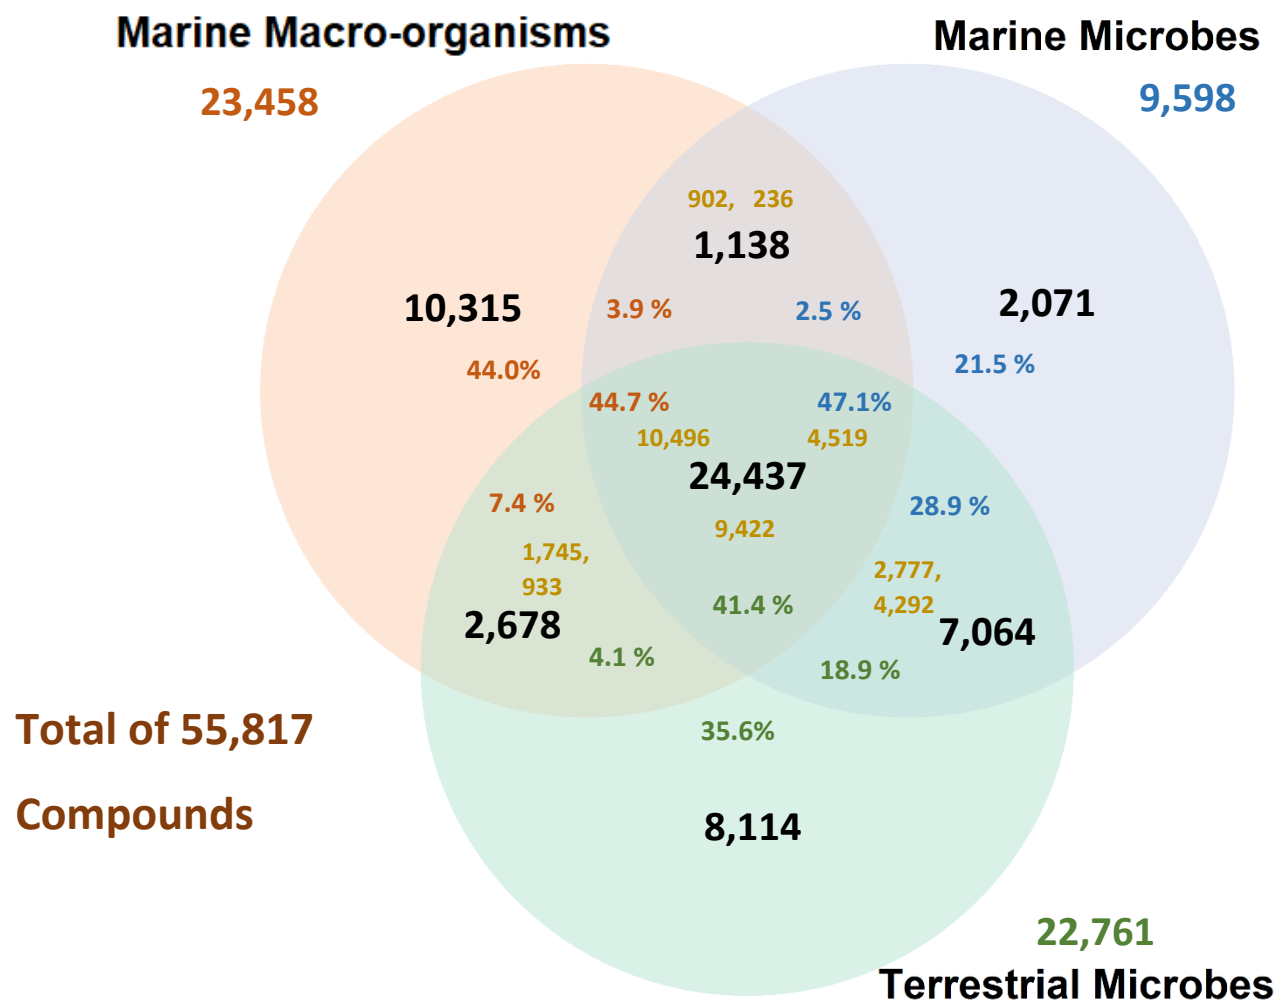

**Fig. S27** Nesting of NP scaffolds from marine macro-organisms (orange), marine microorganisms (blue) and terrestrial microorganisms (green). Total number of NPs in each section is given in black. Smaller numbers represent percentages of total NPs for each biota group. Blue numbers for example relate to the percentage of marine microbial NPs in each section as a proportion of the total 9598 marine microbial NPs. The small orange numbers represent total NPs from each biota group in each intersection. For example, 933 in the terrestrial microorganism/marine macro-organism intersection 28 represents terrestrial microbial NPs.

## Overlap of the Marine Microbial NPs

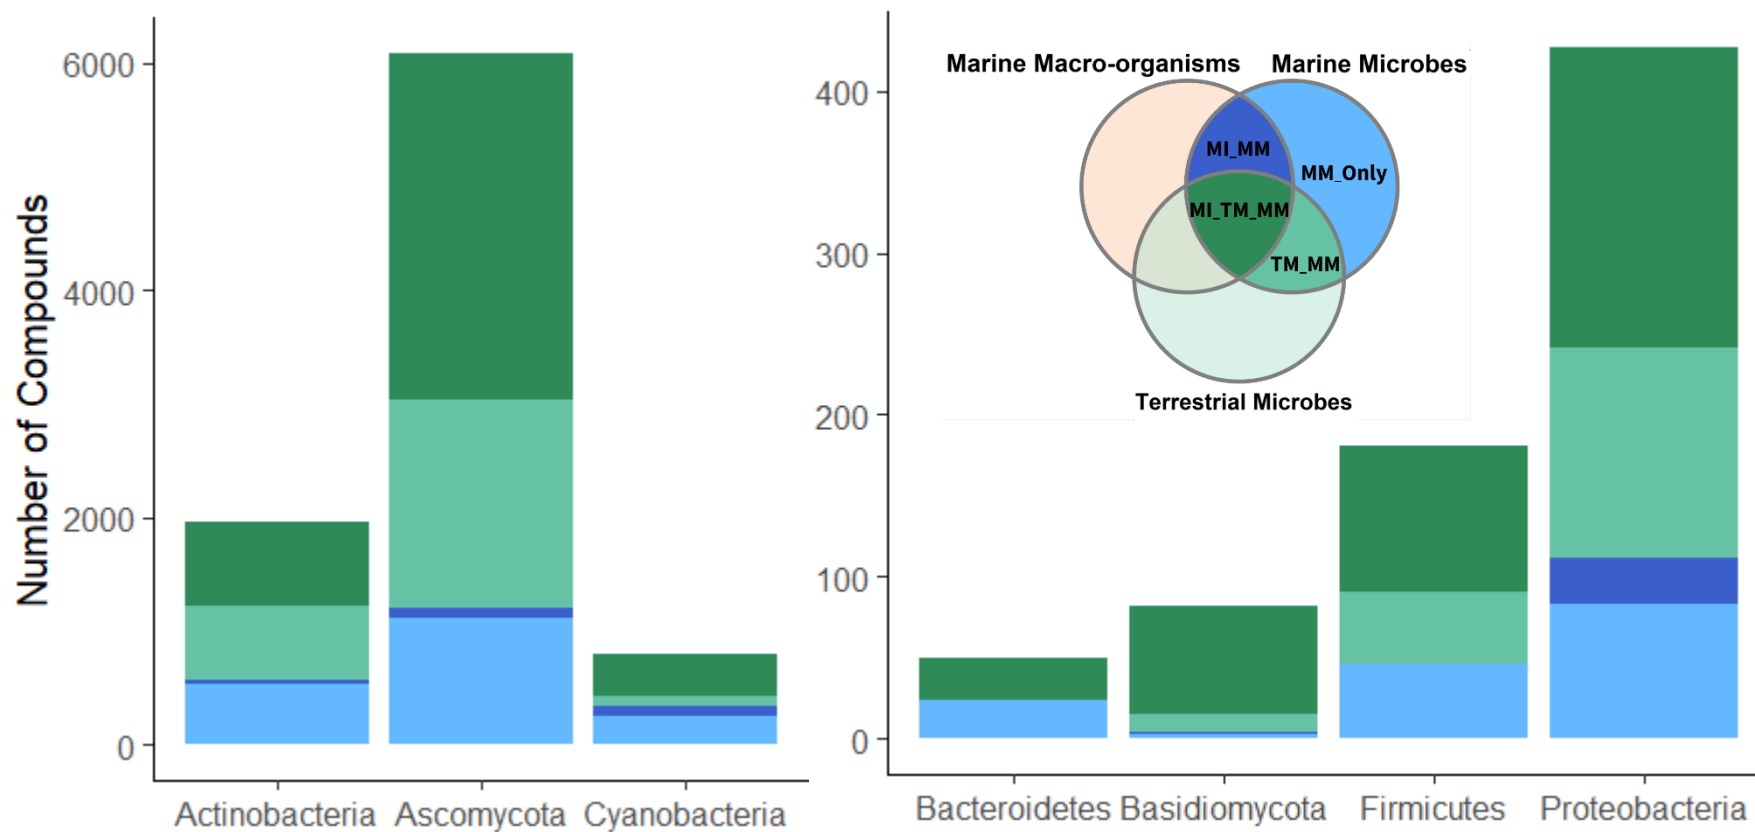

**Fig. S28** Numbers of NPs isolated from marine microorganisms, divided into their respective phyla. Colours indicate if these NPs cluster with NPs from other groups. NPs that cluster only amongst other marine microbial NPs are represented in light blue, NPs that are nested amongst terrestrial microbial NPs are light green, NPs that are nested among NPs from marine macro-organisms are dark blue, and NPs that are nested amongst terrestrial microbial NPs and NPs from marine macro-organisms are shown in dark green.

Closer Look at the Different Overlaps in each Phyla and Genera

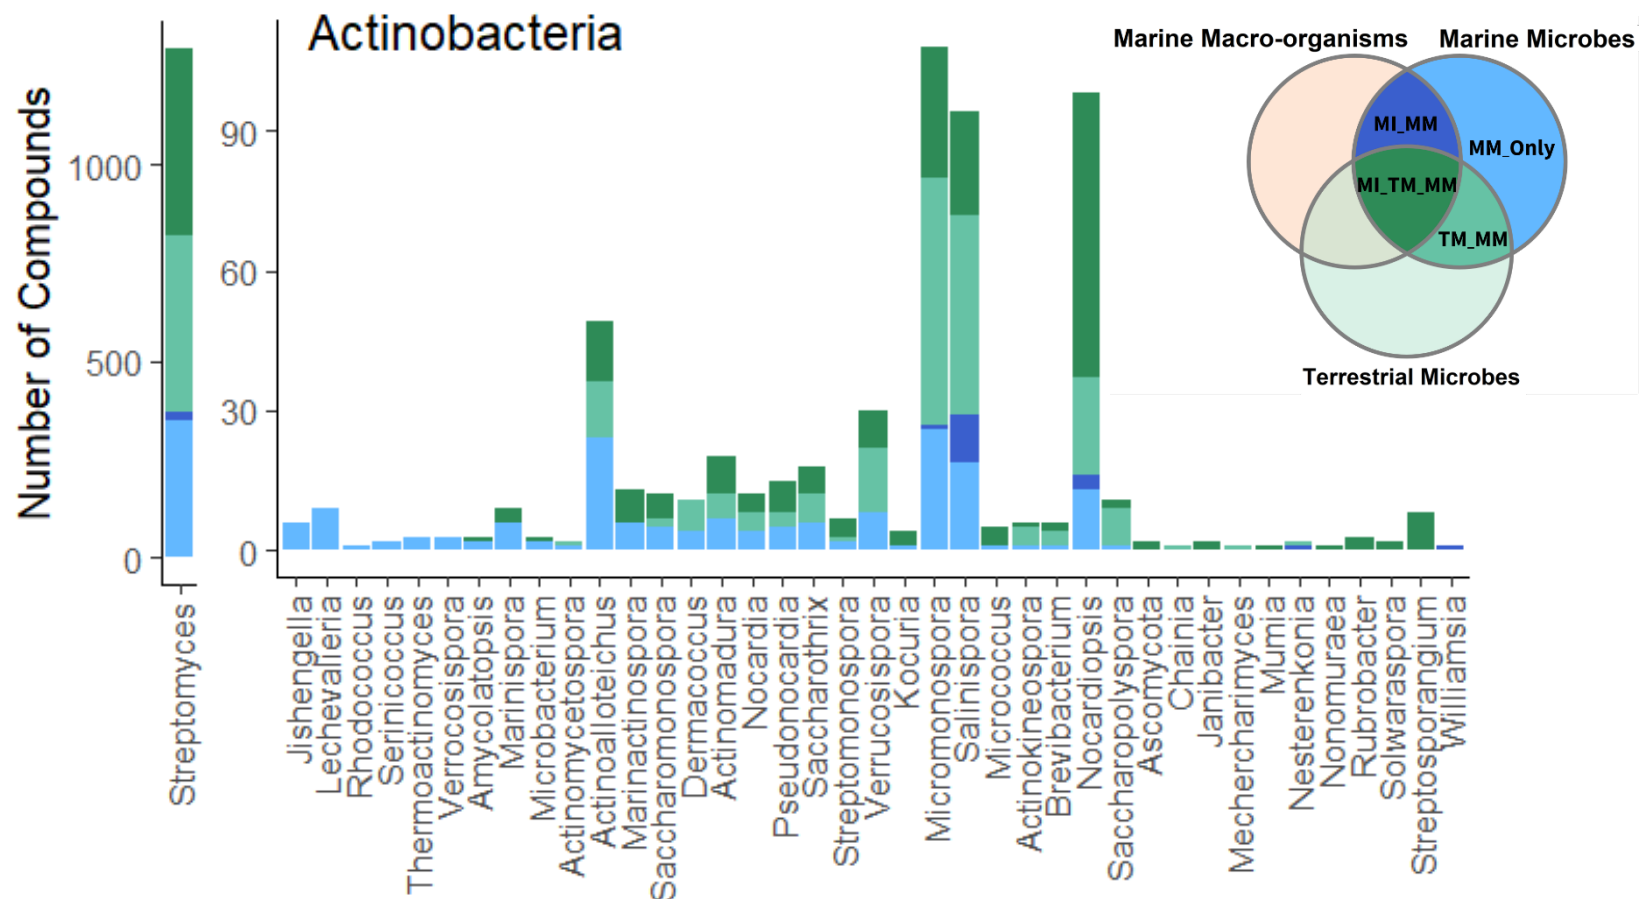

**Fig. S29** All the NPs isolated from **marine Actinobacteria separated by genus**. Different colours represent clusterings with NPs from other groups, based on Murko scaffold analysis. NPs that cluster only amongst other marine microbial NPs are represented in light blue, NPs that are nested amongst terrestrial microbial NPs are light green, NPs that are nested among NPs from marine macro-organisms are dark blue, and NPs that are nested amongst terrestrial microbial NPs and NPs from marine macro-organisms are shown in dark green.

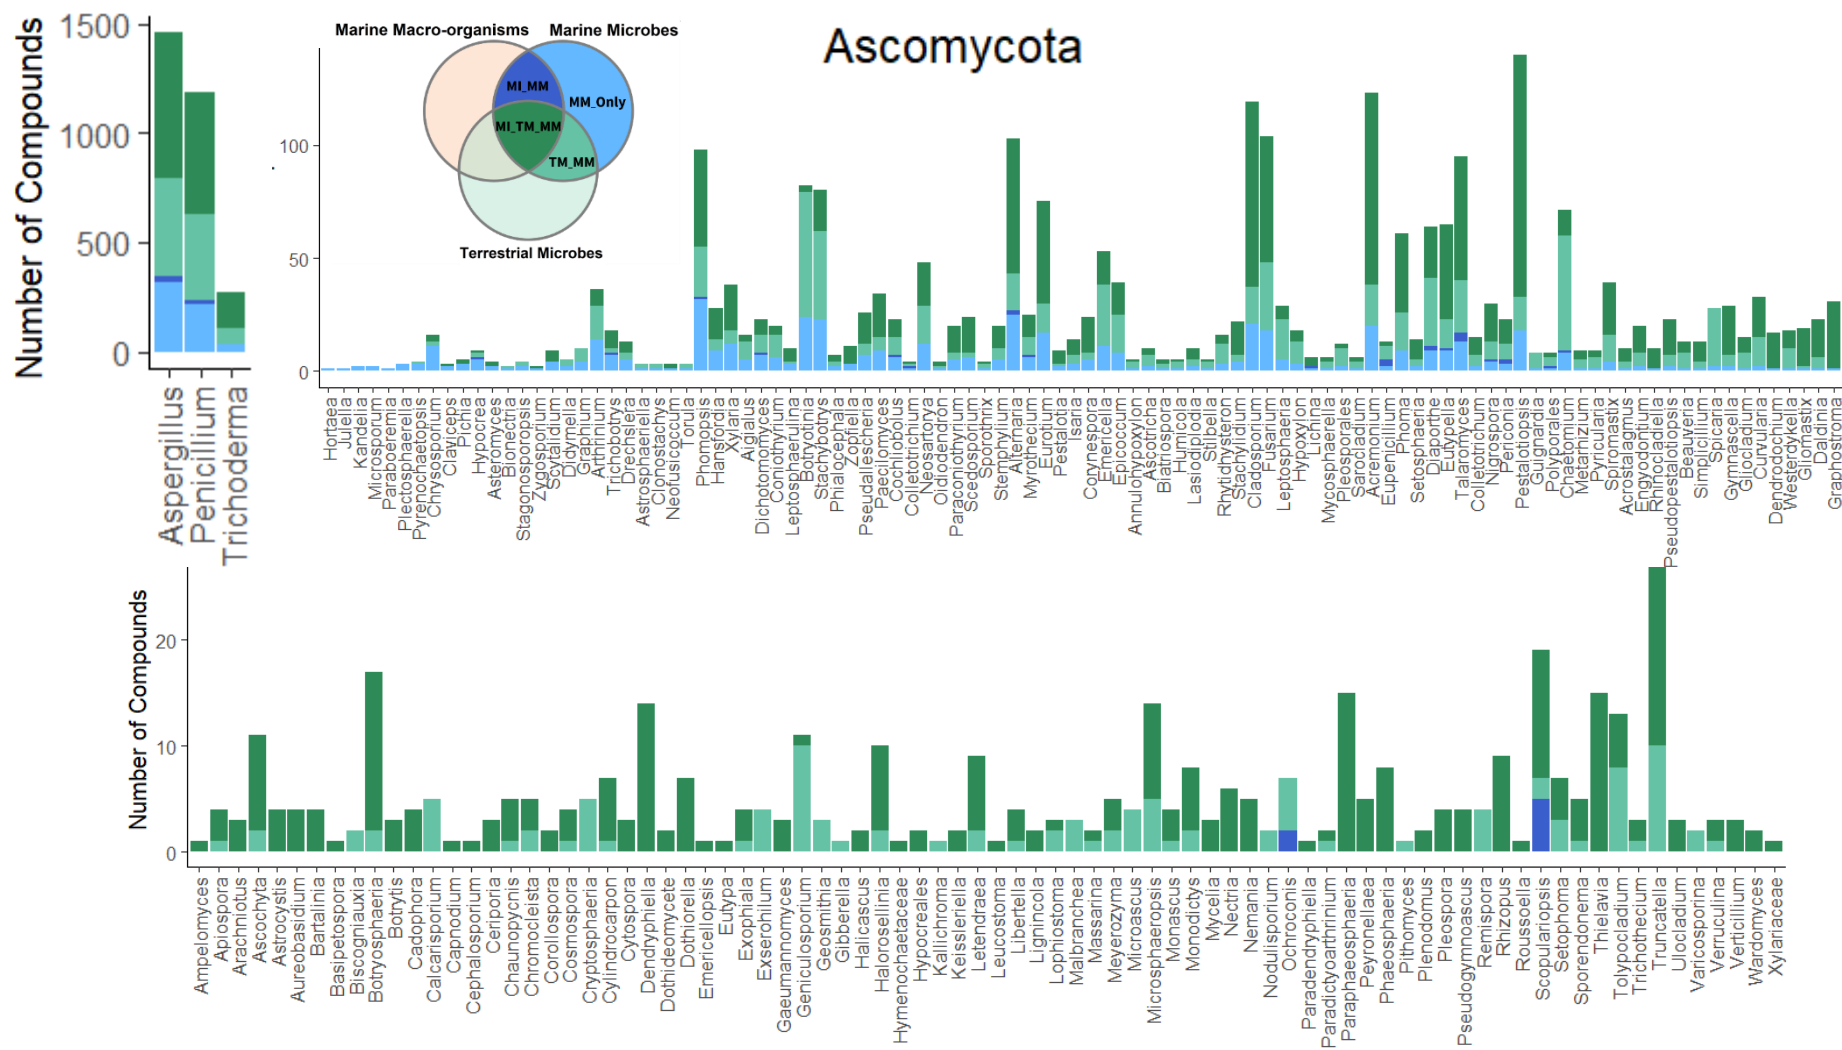

**Fig. S30** All the NPs isolated from **marine Ascomycota separated by genus**. Different colours represent clusterings with NPs from other groups, based on Murko scaffold analysis. NPs that cluster only amongst other marine microbial NPs are represented in light blue, NPs that are nested amongst terrestrial microbial NPs are light green, NPs that are nested among NPs from marine macro-organisms are dark blue, and NPs that are nested amongst terrestrial microbial NPs and NPs from marine macro-organisms are shown in dark green.



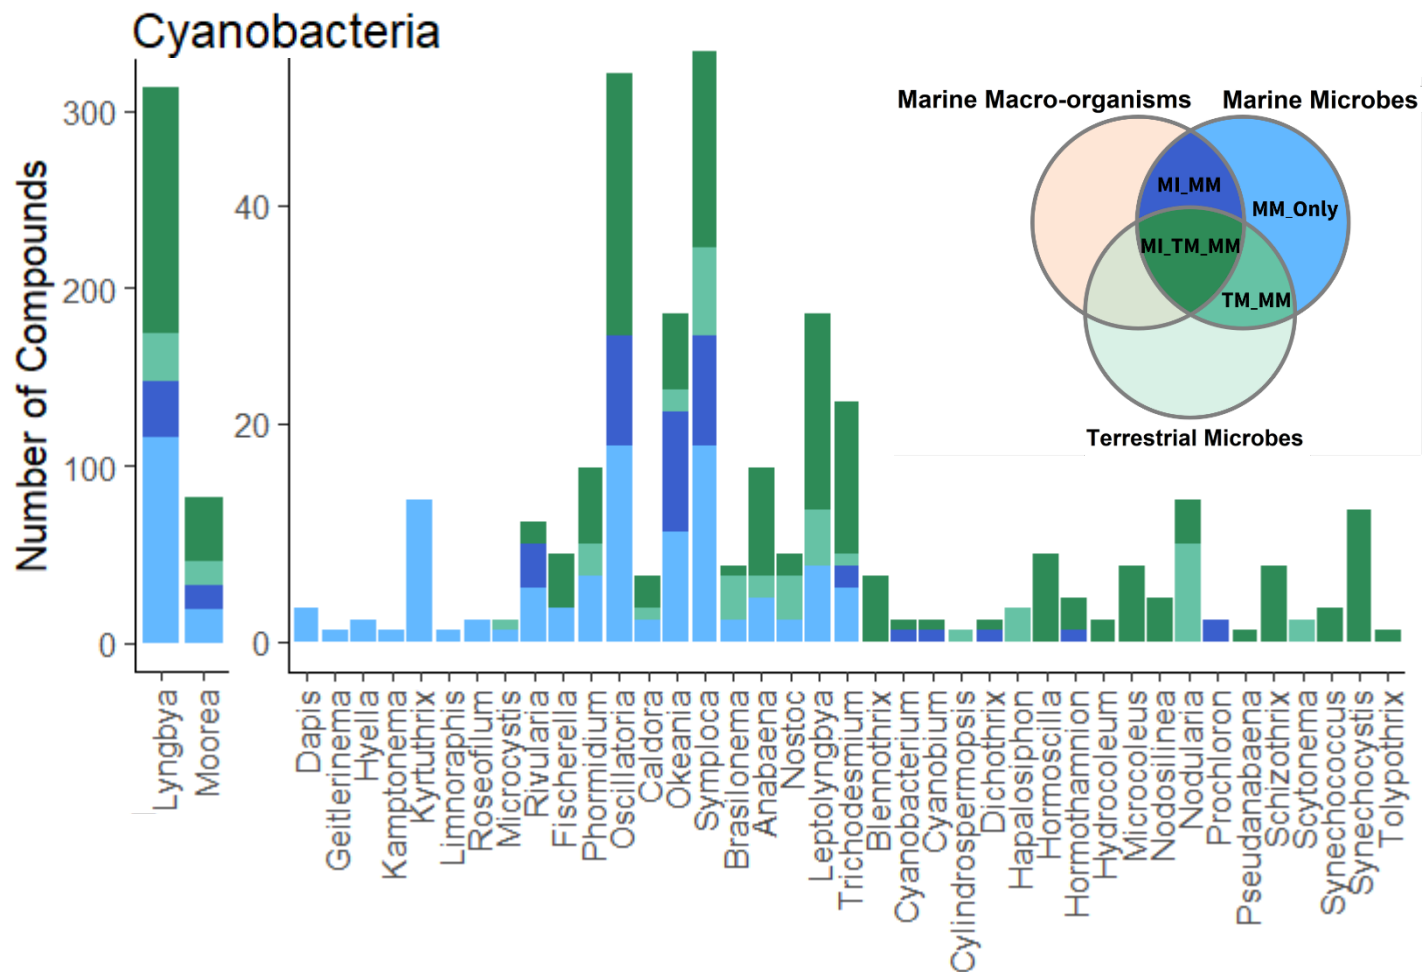

**Fig. S31** All NPs isolated from **marine Cyanobacteria separated by genus**. Different colours represent clusterings with NPs from other groups, based on Murko scaffold analysis. NPs that cluster only amongst other marine microbial NPs are represented in light blue, NPs that are nested amongst terrestrial microbial NPs are light green, NPs that are nested among NPs from marine macro-organisms are dark blue, and NPs that are nested amongst terrestrial microbial NPs and NPs from marine macro-organisms are shown in dark green.

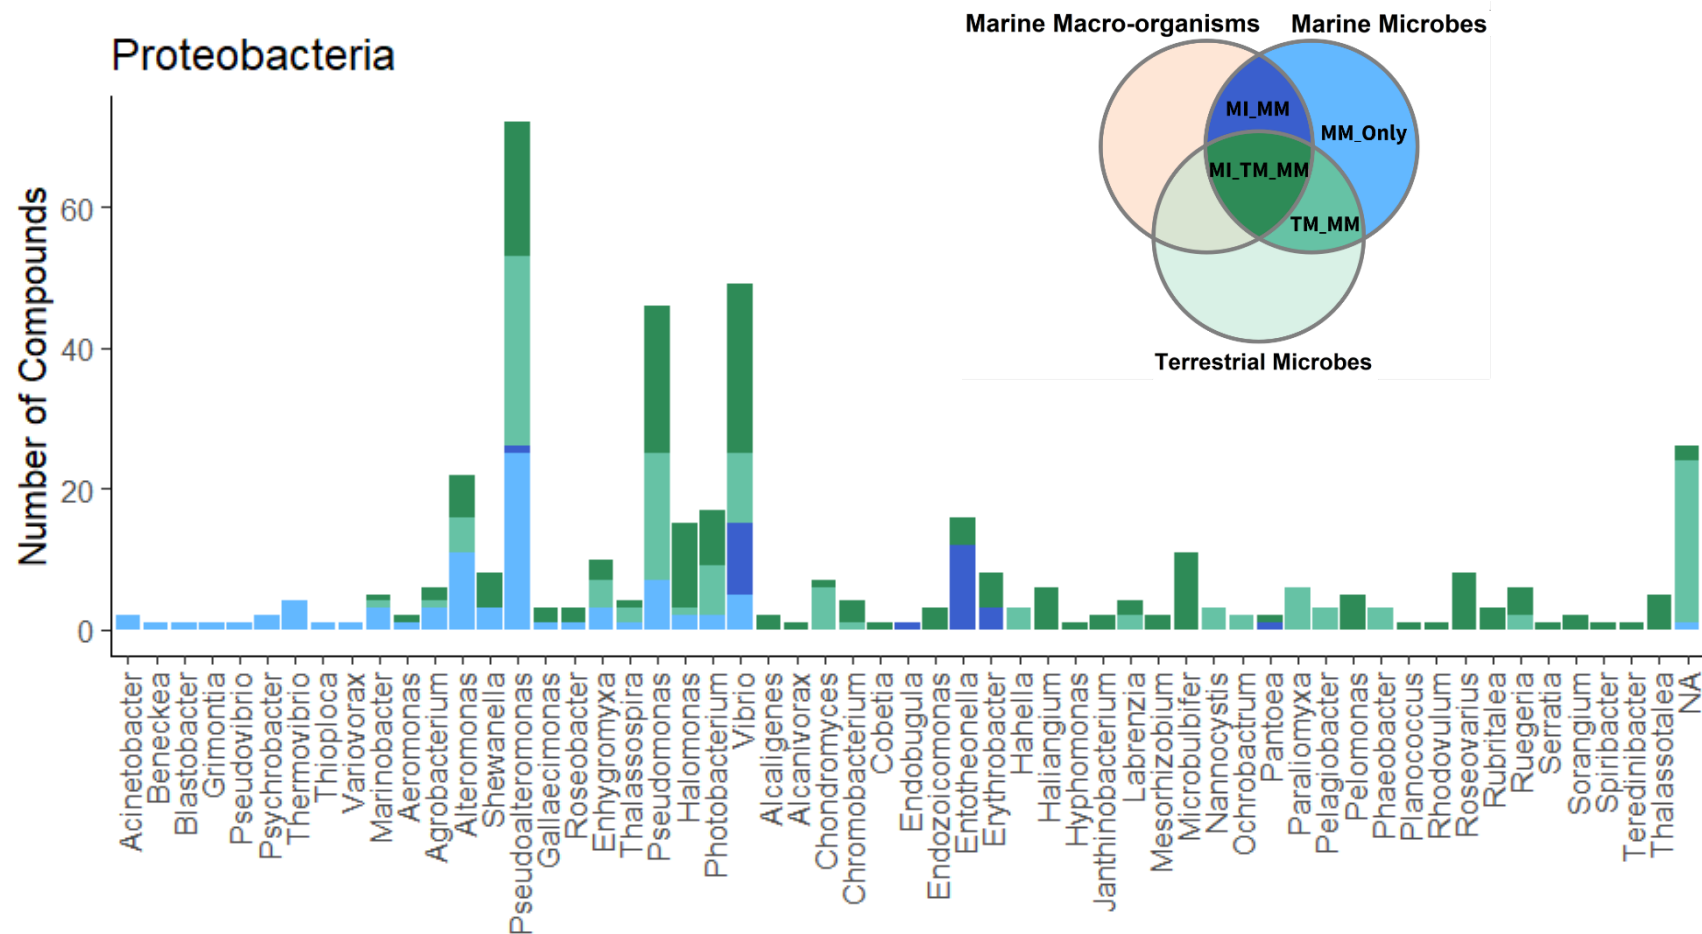

**Fig. S32** All NPs isolated from **marine Proteobacteria separated by genus**. Different colours represent clusterings with NPs from other groups, based on Murko scaffold analysis. NPs that cluster only amongst other marine microbial NPs are represented in light blue, NPs that are nested amongst terrestrial microbial NPs are light green, NPs that are nested among NPs from marine macro-organisms are dark blue, and NPs that are nested amongst terrestrial microbial NPs and NPs from marine macro-organisms are shown in dark green.

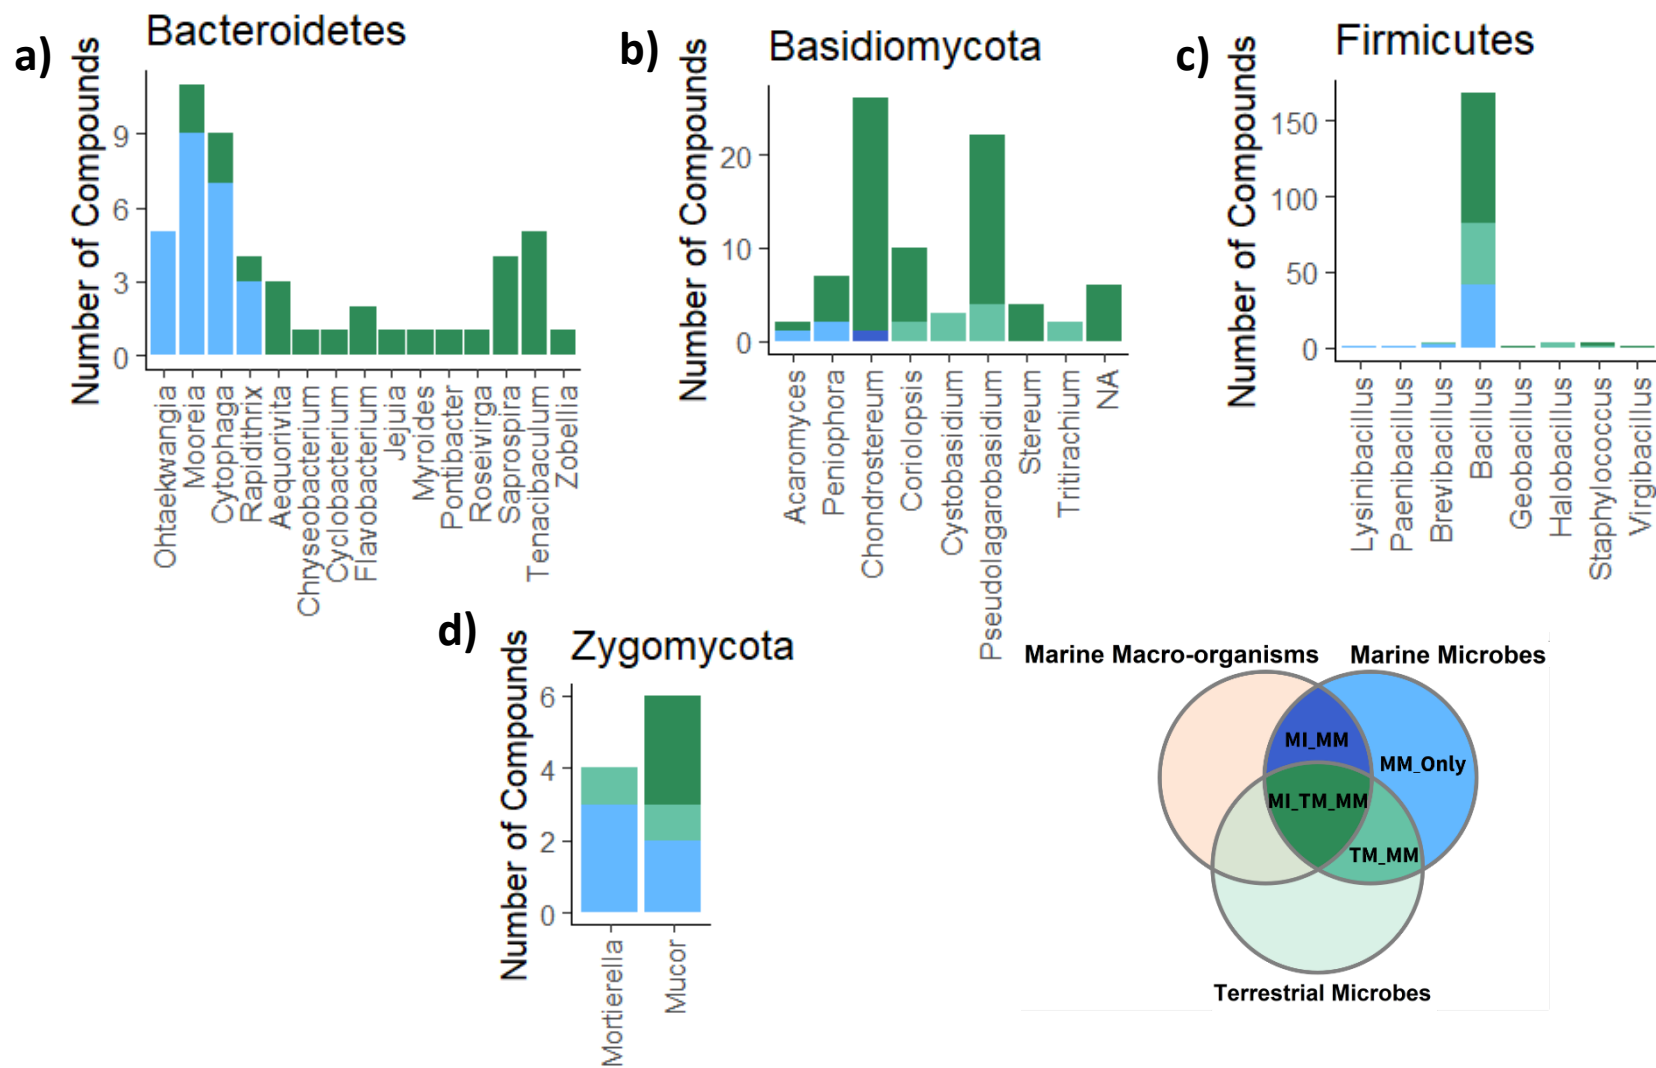

**Fig. S33** All the NPs isolated from **marine Bacteroidetes a)**, **Basidiomycota b)**, **Firmicutes c)** and **Zygomycota d)**. Different colours represent clusterings with NPs from other groups, based on Murko scaffold analysis. NPs that cluster only amongst other marine microbial NPs are represented in light blue, NPs that are nested amongst terrestrial microbial NPs are light green, NPs that are nested among NPs from marine macro-organisms are dark blue, and NPs that are nested amongst terrestrial microbial NPs and NPs from marine macro-organisms are shown in dark green.

## Top Producers of Marine Only Compounds

**Table 2** List of the top producers of marine microbial NPs that do not nest with terrestrial NPs, according to the scaffold analysis. On the left are the top 20 genera according to the absolute number of marine only NPs and on the right are the top 20 genera ranked by proportion of NPs that cluster only with marine microbial NPs versus total compounds produced in the marine environment by this genus. For proportion calculations, genera that produced less than 5 compounds in total were removed from the list.

| Genus             | # of Marine Only |
|-------------------|------------------|
| Streptomyces      | 351              |
| Aspergillus       | 314              |
| Penicillium       | 218              |
| Moorea            | 78               |
| Lyngbya           | 57               |
| Bacillus          | 42               |
| Phomopsis         | 32               |
| Trichoderma       | 31               |
| Micromonospora    | 26               |
| Alternaria        | 25               |
| Pseudoalteromonas | 25               |
| Actinoalloteichus | 24               |
| Botryotinia       | 24               |
| Stachybotrys      | 23               |
| Cladosporium      | 21               |
| Acremonium        | 20               |
| Salinispora       | 19               |
| Fusarium          | 18               |
| Oscillatoria      | 18               |
| Pestalotiopsis    | 18               |

| Genus             | # of Marine Only | Total # of Molecules | Proportion of Marine Only |
|-------------------|------------------|----------------------|---------------------------|
| Jishengella       | 6                | 6                    | 1.0                       |
| Kyrtuthrix        | 13               | 13                   | 1.0                       |
| Lechevalieria     | 9                | 9                    | 1.0                       |
| Mooreaia          | 9                | 11                   | 0.8                       |
| Cytophaga         | 7                | 9                    | 0.8                       |
| Chrysosporium     | 11               | 16                   | 0.7                       |
| Marinispora       | 6                | 9                    | 0.7                       |
| Hypocrea          | 5                | 9                    | 0.6                       |
| Lyngbya           | 57               | 104                  | 0.5                       |
| Agrobacterium     | 3                | 6                    | 0.5                       |
| Alteromonas       | 11               | 22                   | 0.5                       |
| Actinoalloteichus | 24               | 49                   | 0.5                       |
| Marinactinospora  | 6                | 13                   | 0.5                       |
| Rivularia         | 5                | 11                   | 0.5                       |
| Scytalidium       | 4                | 9                    | 0.4                       |
| Saccharomonospora | 5                | 12                   | 0.4                       |
| Graphium          | 4                | 10                   | 0.4                       |
| Arthrinium        | 14               | 36                   | 0.4                       |
| Trichobotrys      | 7                | 18                   | 0.4                       |
| Drechslera        | 5                | 13                   | 0.4                       |

## Similarity Analysis of the Scaffolds

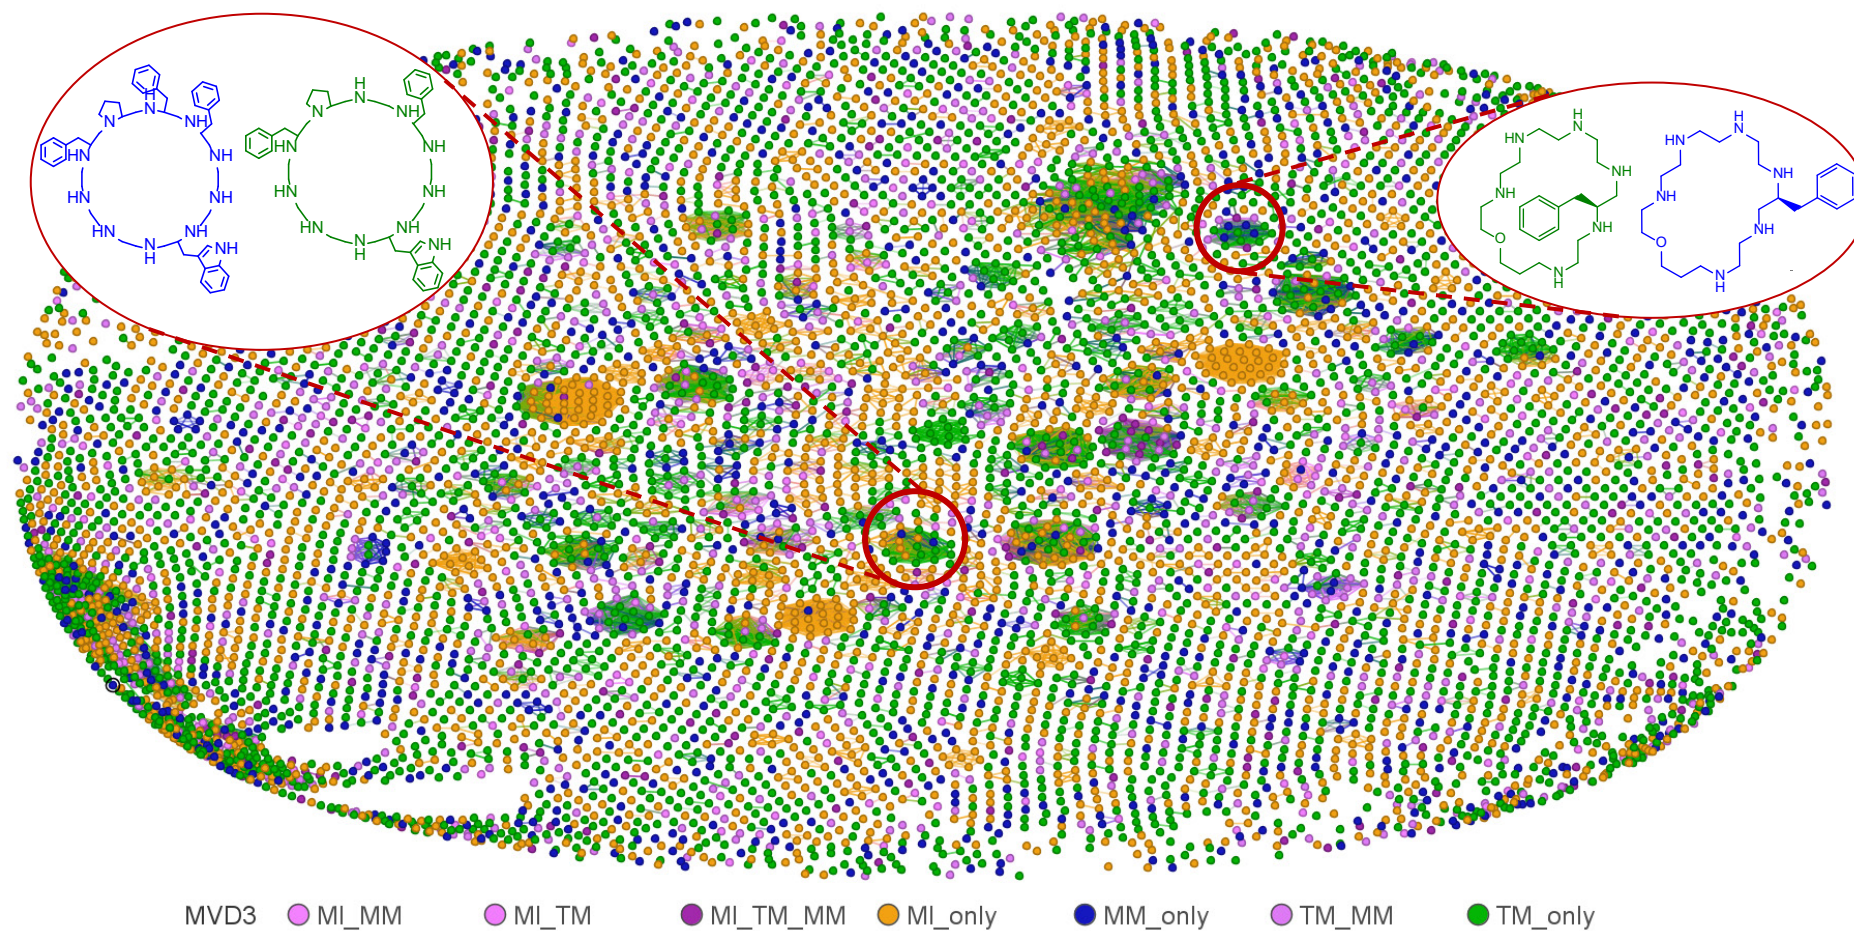

**Fig. S34** Similarity analysis of the scaffolds. Scaffolds that cluster within a classification (same colour) are not a problem, they only inflate the scaffold count, which is eliminated once scaffolds are translated back into the actual number of NPs. However, cluster where there are mixed colours, can be problematic since they show a potential underestimate of the overlap between the different kingdoms. Clusters containing terrestrial only scaffolds (green) and marine only scaffolds (blue), are an example of where cyclic peptides have been sorted into different scaffolds but are structurally very alike (two examples are shown in the red circles).

## World Map

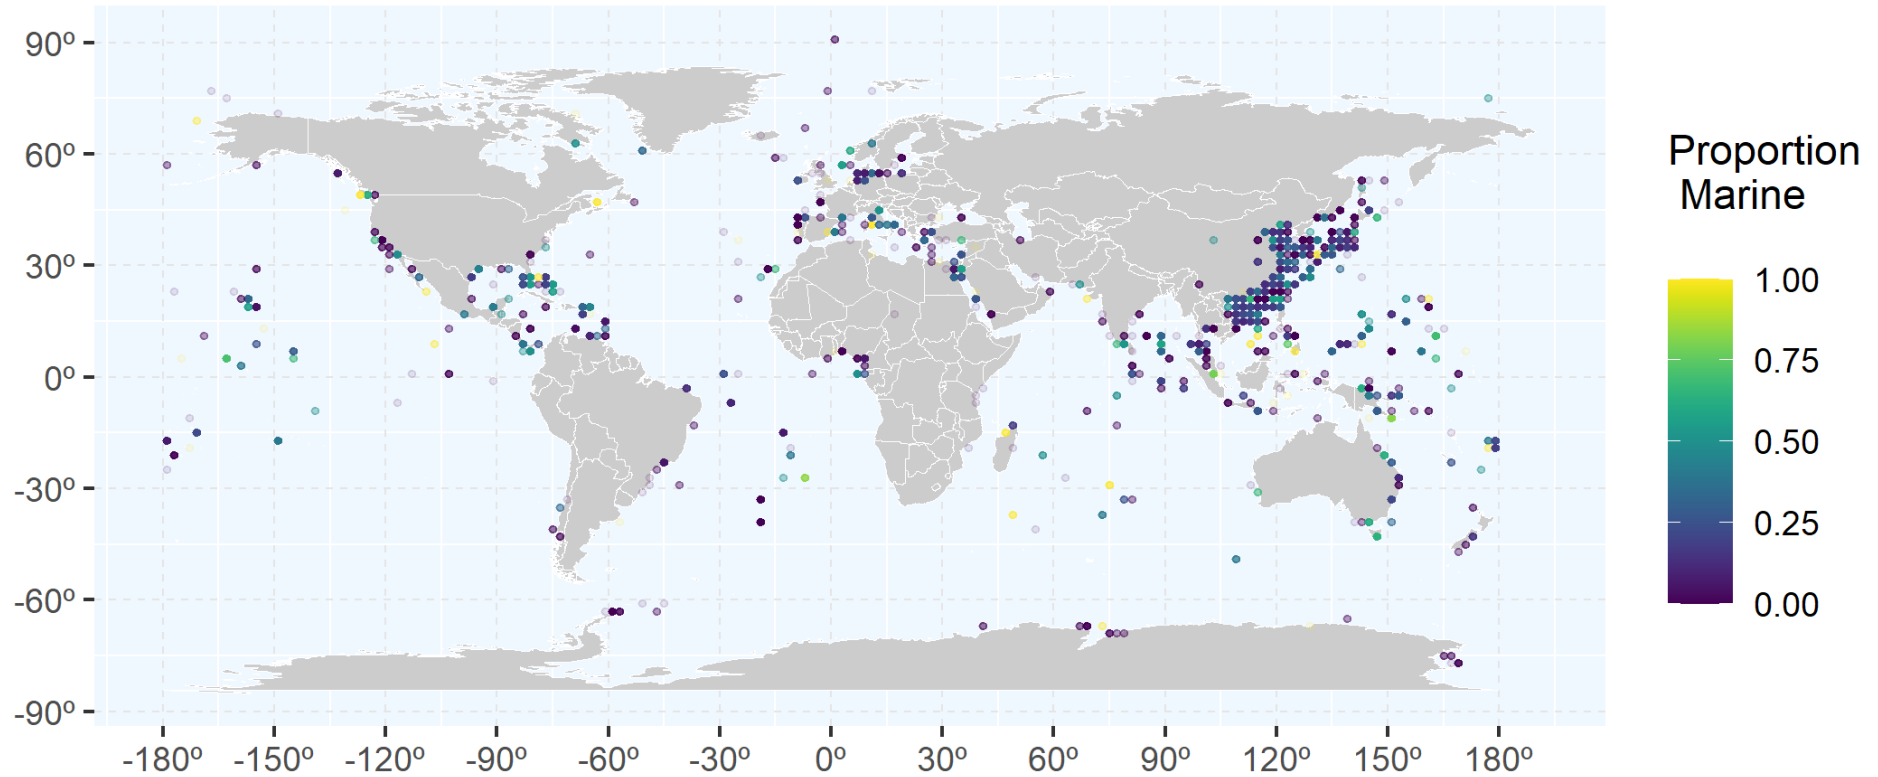

**Fig. S35** World map, showing the distribution of the 8,577 marine microbial NPs that have reported coordinates for microorganism collection. The colours show the proportion of marine microbial NPs found at a specific location ( $2^\circ \times 2^\circ$  grid cell) that are unique to the marine environment and don't cluster with terrestrial NPs, according to the scaffold analysis. The number of NPs found at each location varied substantially, and to represent low numbers of NPs at a location, more transparent dots (log<sub>10</sub> scale) have been used.

## Chemical Structures mentioned in the Highlight

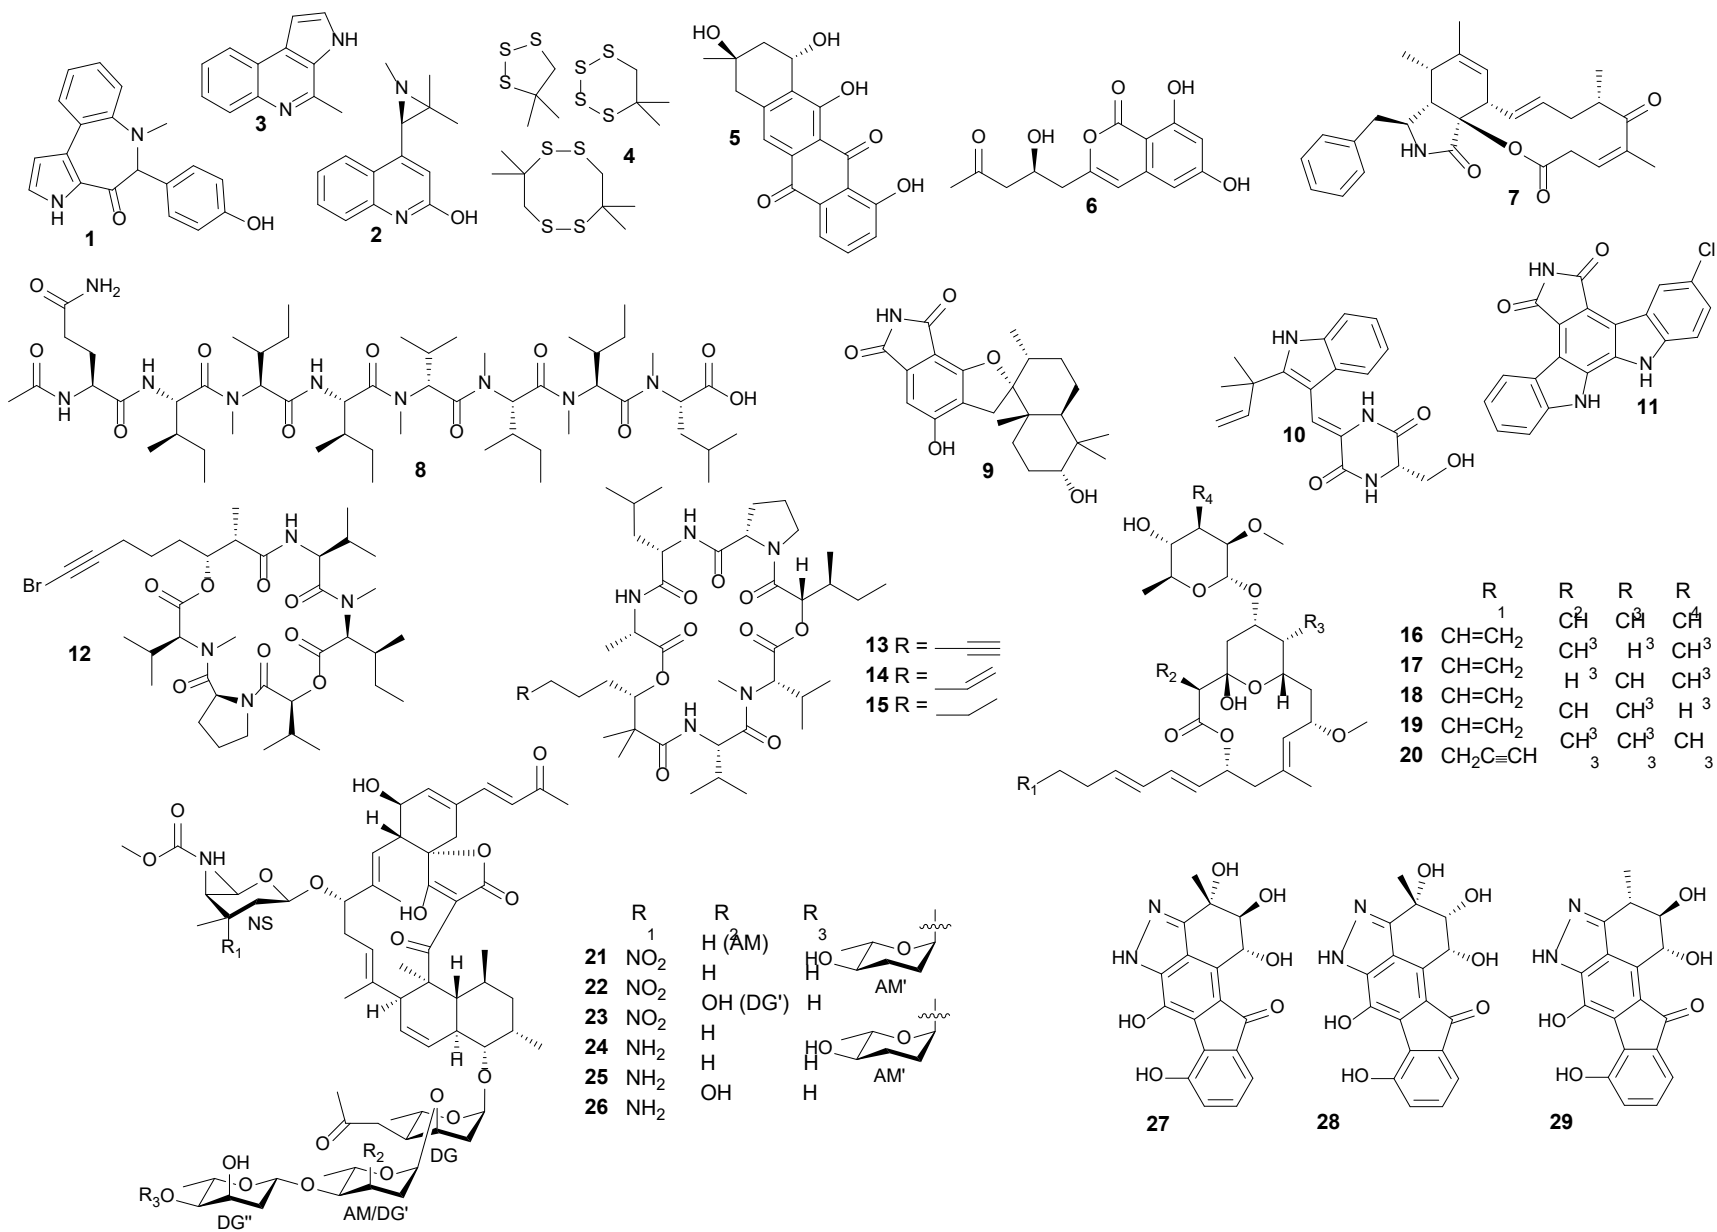

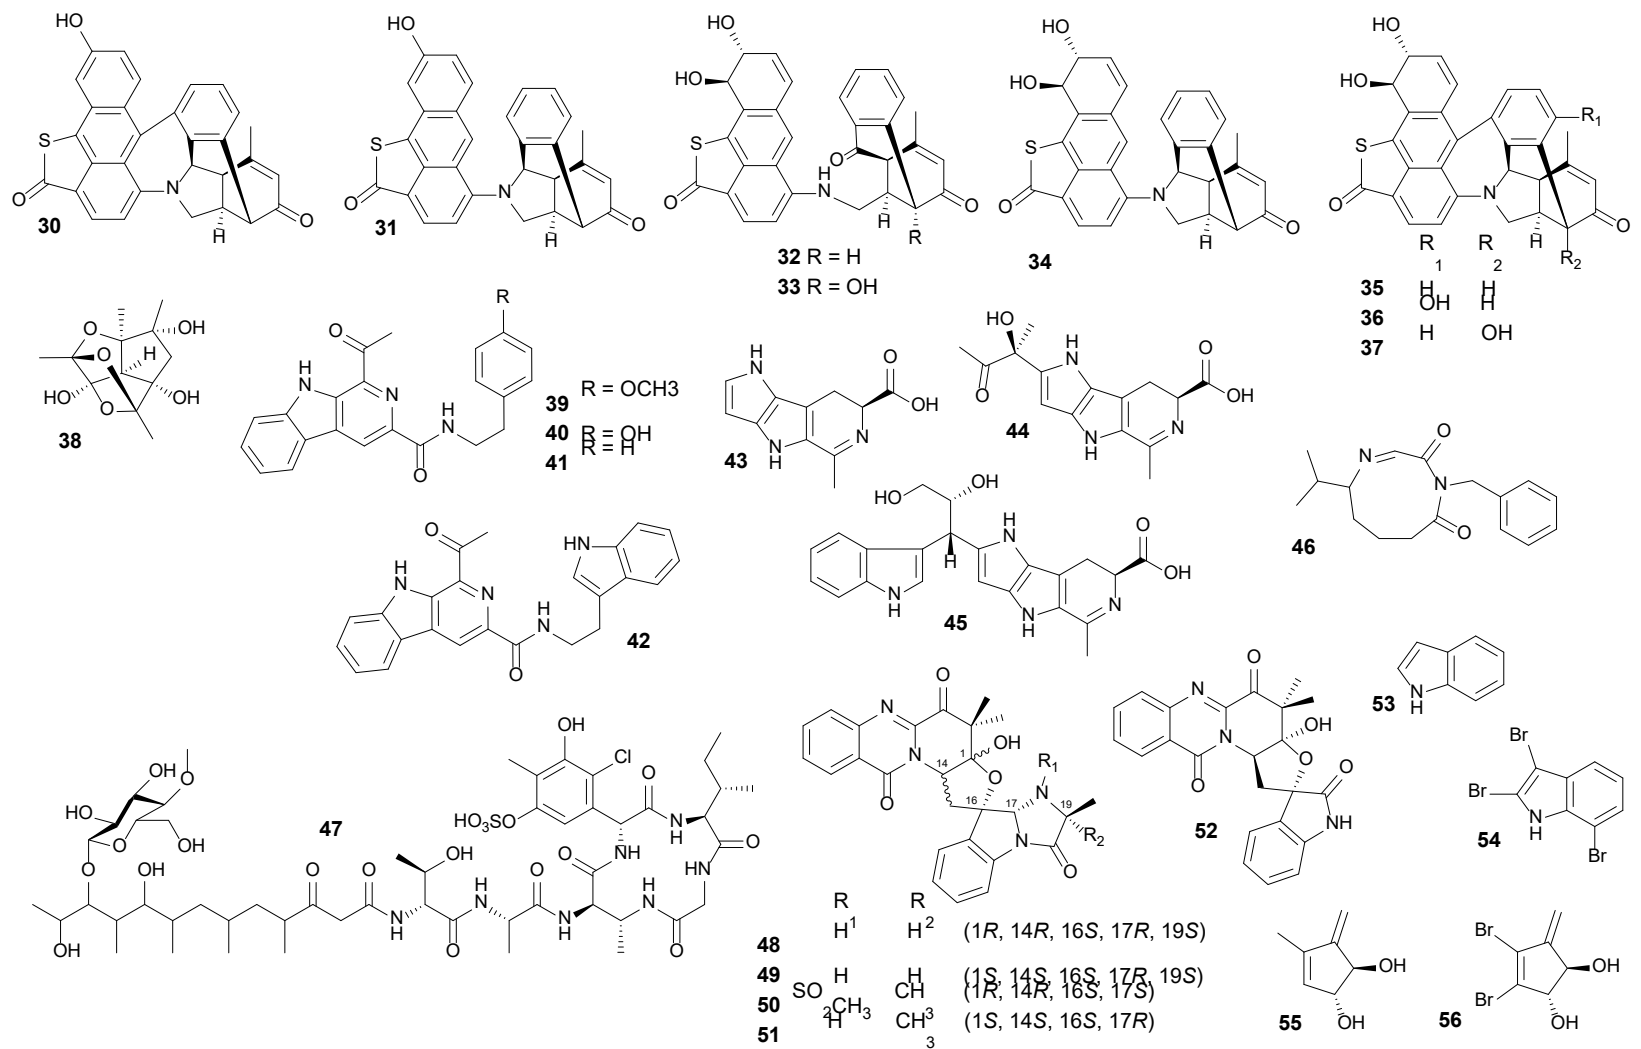



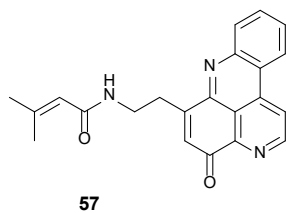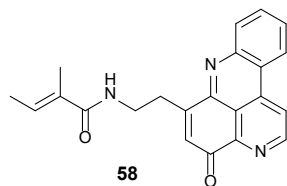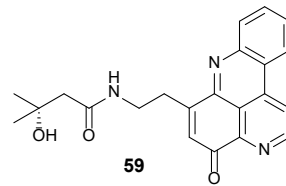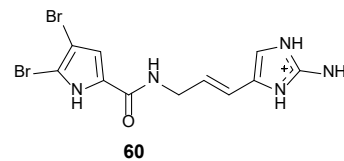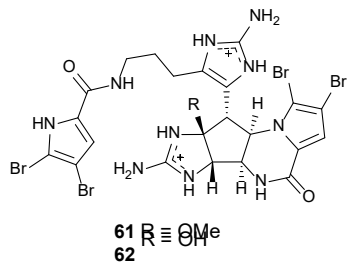

R ≡ OH  
62

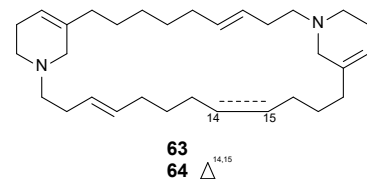

64  $\Delta^{14,15}$

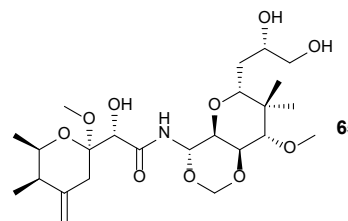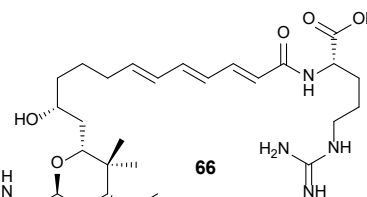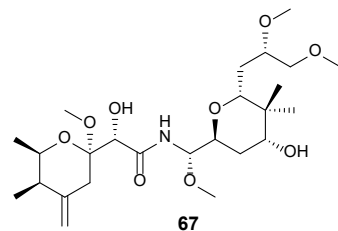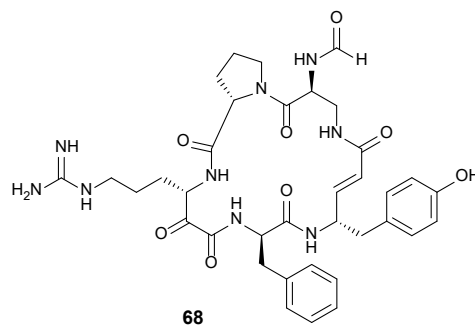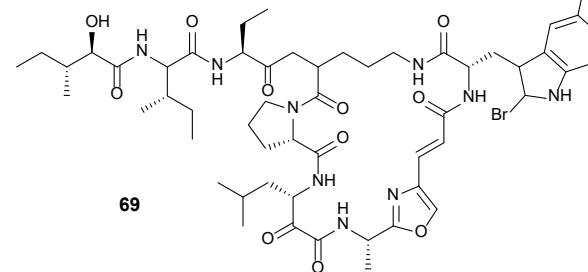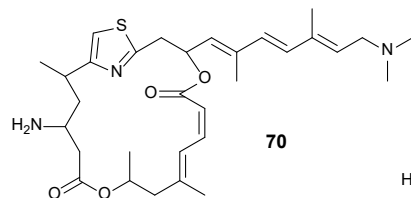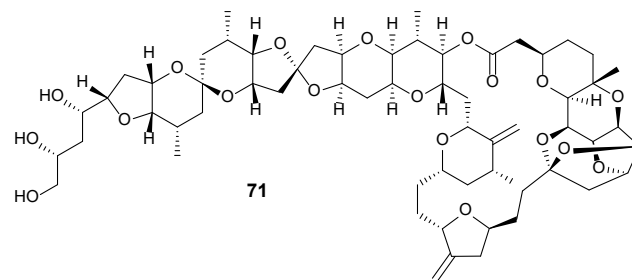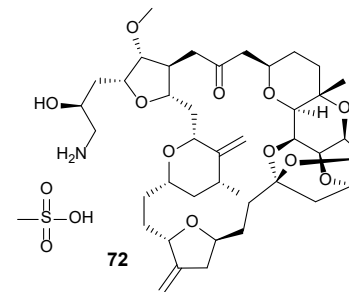

Supplement: d1np00051a1.pdf [file d1np00051a1.pdf]
